# Supplementary material for: An Updated, Homogeneous, and Declustered Earthquake Catalog for South Korea and Neighboring Regions
Source: Copernicus journal article supplement (doi:10.5194/nhess-2024-197), 2025-03-10
Supplement: Supplementary file 1 [file nhess-2024-197-supplement.zip]

## Sheet: Complete_mergedfinal_Mw
Year	Month	Date	Hr	Min	Sec	Latitude	Longitude	Depth	Mw
1905	6	2	14	39	42	34	132	100	7.8
1905	7	7	7	17	0	42	132	100	6.2
1905	8	25	18	46	45	43	129	470	6.8
1909	11	10	15	13	31	32.344	130.65	140	7.6
1913	4	13	15	40	18	31.5	132	35	6.8
1914	1	12	18	28	6	31.5	131	50	7
1917	7	31	12	23	11	42.422	130.24	460	7.5
1918	2	10	5	46	26	43	130	450	6.5
1919	3	14	8	12	49.28	33.6183	131.666	91	5.2
1919	4	25	21	22	51.14	32.5487	130.253	2	5.3
1919	5	10	14	14	52.17	32.796	130.335	0	5.1
1919	7	2	16	21	0.45	33.0308	131.808	10	5.2
1919	12	12	1	44	51.84	33.7115	131.656	70	5
1919	12	21	6	41	34.84	31.4433	131.796	0	6
1920	2	23	15	33	25.63	33.4562	132.421	22	5.3
1920	5	6	18	40	35	43	131.5	520	6.2
1920	5	22	4	19	30.13	32.6567	131.989	10	5.4
1920	7	16	19	15	51.83	31.7887	132.017	3	5.2
1920	12	19	7	51	14.12	33.0477	130.708	0	5.3
1920	12	20	0	12	7.21	32.7937	130.202	0	4.5
1921	1	12	23	53	18.5	33.4998	131.934	35	4.8
1921	4	19	2	58	54.02	32.4755	132.068	36	5.3
1921	4	25	16	11	3.37	33.625	131.911	92	5
1921	9	2	2	22	26.36	32.339	131.442	65	4.4
1921	10	14	4	34	44.69	32.8062	131.661	0	5
1921	11	15	13	50	2.35	35.6032	130.91	7	5.1
1921	11	15	22	51	27.43	35.1158	130.936	0	5
1921	11	16	22	52	35.31	31.2165	131.521	40	5.2
1922	1	31	22	17	31.92	41.115	125.54	15	7.3
1922	7	12	13	30	57.79	33.2372	131.385	15	4.6
1922	8	9	6	6	59.09	33.7933	132.267	14	4.8
1922	12	8	1	50	19	32.629	129.69	15	6.8
1922	12	8	5	6	59.88	32.6727	130.113	0	5
1922	12	8	7	21	47.37	32.7695	130.112	0	5.3
1922	12	8	11	2	0	31.5	130	0	6.2
1922	12	8	11	2	10.7	32.7527	130.125	0	6.2
1922	12	8	14	16	51.76	32.8265	130.279	14	5.3
1922	12	8	15	44	54.29	32.9193	130.037	13	5.5
1922	12	8	22	39	1.79	32.8342	130.139	0	4.5
1923	1	11	21	24	25.24	32.0977	132.359	44	5.5
1923	1	12	0	56	56.28	32.4093	132.183	40	5.3
1923	2	9	1	45	29.4	32.6153	129.982	2	4.5
1923	3	3	19	24	33.45	42.0307	131.687	632	5.3
1923	4	17	10	28	32.98	32.2718	130.77	38	4.8
1923	5	7	11	37	39.27	32.8655	130.117	20	4.3
1923	5	26	12	33	3.46	33.0062	130.035	0	4.4
1923	7	14	8	56	15	31.5	130	0	6.3
1923	7	22	3	26	48.51	31.3338	131.921	9	4.8
1923	7	27	8	27	6	43	130	430	6
1923	7	27	8	37	10.08	42.968	131.619	512	5.6
1923	9	17	7	59	39.43	31.2233	131.66	123	5
1923	10	3	23	21	48.66	32.9887	131.575	63	5.1
1923	10	11	17	21	9.17	31.279	132.143	0	5.1
1923	11	27	12	21	30.81	31.5707	132.213	29	5.7
1923	12	5	8	39	0	32	127.5	0	6.2
1923	12	20	21	47	18.12	32.5087	129.968	0	4.8
1924	2	3	2	28	52.2	32.2997	129.363	0	5.4
1924	3	24	9	51	54.32	33.4873	131.95	38	5.2
1924	4	1	16	3	58.27	31.0753	131.201	0	5.3
1924	6	6	18	18	39.84	32.0715	131.274	110	5
1924	6	22	9	46	30.43	32.3853	129.866	15	4.8
1924	6	30	18	9	34.82	32.4142	130.463	2	5.3
1924	7	22	21	42	32.58	32.653	130.042	3	5
1924	8	29	8	50	36	33.5	131	35	6.1
1924	8	29	8	50	36.25	32.841	131.93	0	5.8
1924	11	30	10	21	11.77	31.3713	131.823	0	5.5
1924	11	30	10	32	0.88	31.493	131.77	0	5.6
1925	3	9	18	2	49.92	32.796	130.183	0	5
1925	3	16	13	28	36.44	32.3255	129.742	13	5.7
1925	4	24	1	11	21.38	33.0087	131.581	128	4.8
1925	5	1	15	6	27.89	33.472	132.141	0	4.8
1925	5	1	17	17	14.78	33.6465	132.268	1	5.2
1925	5	7	2	3	35.35	33.3347	131.838	0	4.3
1925	5	10	4	24	1.31	34.0507	131.786	65	4.6
1925	5	24	12	52	16.9	32.7395	131.867	0	5.4
1925	6	11	15	45	55.19	33.9078	131.228	10	4.6
1925	6	11	15	59	43.13	34.1043	131.122	17	4.1
1925	6	27	2	27	25.18	32.1073	131.59	0	4.8
1925	7	13	15	9	27.05	33.3913	132.213	57	4.5
1925	8	4	6	13	43.73	33.6843	131.07	16	4.3
1925	8	10	9	36	52.9	33.4307	131.063	0	4.7
1925	9	17	17	9	35.39	32.3408	129.143	32	5.4
1925	11	26	23	4	9.54	33.3072	131.89	0	4.1
1926	1	22	6	26	53.31	33.3367	132.163	10	5.2
1926	1	25	23	39	29.02	31.1427	131.626	0	5.3
1926	1	30	20	53	29.27	33.508	131.775	81	4.7
1926	2	13	12	4	25.04	33.3683	132.15	41	4.2
1926	4	7	8	45	27.8	31.6115	131.804	0	5.3
1926	4	7	8	56	17.99	31.6163	131.964	30	5
1926	4	25	17	1	15.31	31.9133	131.875	43	4.5
1926	6	5	18	9	39	31	130	180	6.5
1927	1	10	0	19	56.66	32.0855	130.139	7	4.3
1927	2	18	21	11	41.25	32.668	130.809	102	4.8
1927	5	8	20	14	53.77	32.0958	130.005	32	4.3
1927	5	10	17	39	34.85	33.198	131.384	98	4.4
1927	6	10	2	51	10.38	32.044	130.996	0	4.2
1927	8	9	3	49	55.17	31.9402	131.655	142	4.7
1927	8	21	11	35	13.41	32.2418	129.987	0	4.4
1927	9	11	15	54	22.57	31.8957	131.361	47	4.5
1927	9	14	13	18	56.73	33.796	131.849	33	4.2
1927	10	17	15	4	7.83	31.8823	131.738	0	4.9
1927	10	17	15	13	27.75	31.7537	131.72	0	4.6
1927	10	18	21	44	37.73	32.1627	129.763	9	5.1
1927	10	30	10	0	57.42	32.1105	130.383	23	3.9
1927	12	4	12	53	6.12	32.5047	129.727	6	5.2
1927	12	4	13	15	6.86	32.575	130.083	0	4.1
1927	12	4	13	48	0.61	32.5693	130.025	0	4.5
1927	12	4	14	53	41.38	32.4965	130.008	8	3.9
1927	12	4	18	43	10.39	32.5522	129.996	24	3.8
1927	12	4	21	18	18.75	32.4295	130.126	3	5
1927	12	11	22	12	45.96	32.1775	131.256	111	4.3
1928	2	15	1	16	52.5	32.1633	130.911	21	3.9
1928	2	15	8	44	41.23	32.4427	131.168	14	4.3
1928	2	22	1	28	6.82	32.9682	132.083	98	4
1928	2	28	12	33	20	32.5705	130.841	9	3.9
1928	3	15	4	7	5.73	32.539	129.725	12	3.9
1928	3	23	5	16	9.82	34.469	132.409	8	4.3
1928	4	16	22	41	29.18	31.3502	131.351	65	4.5
1928	4	30	20	3	14.07	31.272	128.751	34	5.2
1928	4	30	20	5	39.18	32.7187	129.284	12	4.6
1928	5	30	3	17	32.11	31.9233	131.016	107	4.1
1928	6	3	17	31	4	31.639	128.91	10	6.6
1928	6	3	18	18	48.61	32.438	128.541	0	5.5
1928	6	4	12	10	47.59	31.4852	129.259	0	4.2
1928	6	4	16	52	59.45	31.4492	129.27	84	4.3
1928	6	5	14	55	24.13	31.3505	128.607	31	5.4
1928	6	6	18	57	14.13	31.4213	129.142	0	4.3
1928	6	14	9	27	34.74	31.0532	130.514	113	4.8
1928	7	10	15	20	20.57	32.5015	129.609	11	4.7
1928	7	17	2	50	41.07	31.2423	129.359	0	4.3
1928	8	22	10	30	32.11	32.7322	130.635	6	5
1928	8	22	10	36	13.48	32.7423	130.842	8	4.1
1928	8	30	4	3	2.16	32.7498	130.754	24	4.1
1928	9	23	11	8	1.65	33.5047	131.576	0	4.3
1928	9	25	13	58	42	33.5	132	120	6.1
1928	9	28	17	5	51.61	32.873	130.886	5	4.3
1928	11	5	13	40	55.59	33.362	131.124	40	4.7
1928	11	16	12	13	32.8	32.5533	129.747	3	4.4
1928	11	17	18	52	8.69	33.0787	130.982	0	4.1
1928	12	4	1	32	37.53	32.008	128.51	32	5
1928	12	10	6	20	16.04	33.1458	129.616	24	4.5
1928	12	21	0	8	5.24	32.8733	129.607	0	4.1
1928	12	22	4	36	31.74	33.0083	130.764	0	4.2
1928	12	22	4	56	50.36	33.1305	131.04	14	3.7
1928	12	22	8	17	32.22	33.0785	131.108	18	4.6
1928	12	22	12	35	15.58	33.0513	130.882	0	3.8
1928	12	29	2	10	44.86	33.2948	130.777	43	3.9
1928	12	30	14	25	10.06	32.109	128.756	0	4.5
1929	1	2	1	40	6.27	33.1207	130.867	4	5.3
1929	1	12	0	33	4.66	32.8517	130.828	0	4.1
1929	1	18	20	22	48.94	33.3285	132.241	21	4.3
1929	1	19	1	16	16.9	33.0617	131.035	13	4.1
1929	2	9	21	27	45.74	32.8943	130.645	0	5
1929	2	15	21	0	54.01	32.9083	130.636	2	4
1929	3	15	19	13	43.27	32.8702	132.234	18	4.5
1929	3	21	5	3	22.92	34.3763	129.423	0	4.8
1929	3	25	12	20	26.31	33.4483	132.222	18	4.2
1929	4	12	9	51	1.88	31.5725	130.691	111	4.5
1929	4	15	14	59	2.8	32.4927	131.189	121	4.5
1929	5	21	18	14	18.89	33.0292	127.508	9	4.6
1929	5	22	1	35	36	31.823	131.57	35	6.8
1929	5	22	1	58	1.89	31.811	131.97	2	5
1929	5	22	2	10	24.22	31.7897	131.994	22	5.1
1929	5	22	2	20	59.4	32.1288	132.133	0	4.8
1929	5	22	6	27	44.41	31.9857	131.974	9	4.4
1929	5	22	9	18	53.79	33.2877	127.356	0	4.1
1929	5	24	14	25	35.02	31.7797	131.976	23	4.5
1929	5	27	8	0	56.37	31.3917	132.068	54	4.6
1929	5	29	8	38	56.49	32.664	130.859	33	3.6
1929	6	9	8	18	11.5	33.1717	131.041	0	3.9
1929	6	12	4	32	21	31.8783	132.237	60	4.6
1929	6	12	15	9	23.97	32.0587	132.103	20	4.4
1929	6	26	17	46	0.63	34.9737	131.369	0	4.5
1929	8	4	1	0	4.53	34.232	130.616	9	5.2
1929	8	8	22	29	23.59	33.7115	130.496	27	3.9
1929	8	8	22	33	18.88	33.5392	130.273	9	5
1929	8	16	15	16	29.87	32.5368	132.019	39	4.3
1929	8	31	12	2	53.88	34.177	131.387	14	4.1
1929	8	31	12	7	28.66	34.2808	131.274	37	4.4
1929	9	5	21	56	4.09	33.8382	132.194	13	4.1
1929	9	17	6	34	30.02	31.2755	131.577	8	4.3
1929	10	1	0	58	36.48	33.558	131.493	122	4.5
1929	10	2	21	36	38.76	32.5458	129.287	0	4.5
1929	10	10	4	45	25.56	33.1477	131.33	140	4.7
1929	10	25	3	57	19.99	32.6115	130.458	39	4.8
1929	10	25	21	34	3.19	32.7452	130.145	3	4.2
1929	11	2	1	2	56.48	31.7067	131.903	57	4.5
1929	12	18	13	2	36.47	35.8307	129.713	19	4.3
1929	12	21	10	47	33.54	33.79	132.211	24	4.1
1929	12	26	18	0	30.82	32.2575	132.169	11	4.7
1930	1	2	11	57	35.45	32.7932	130.105	0	4.4
1930	1	11	3	14	20.24	31.6428	131.884	37	5
1930	1	15	12	35	18.67	32.6313	129.936	0	4.3
1930	1	25	11	34	17.16	32.7713	131.281	169	4.7
1930	2	5	22	28	22.73	33.4618	130.313	0	4.9
1930	2	27	21	11	13.88	32.2947	131.81	0	4.5
1930	3	20	0	29	41.2	32.0982	132.07	4	4.6
1930	3	23	7	10	24.37	32.7562	130.036	19	4.2
1930	3	27	4	11	45.51	33.6398	132.441	6	4.1
1930	3	31	5	9	23.34	33.376	132.015	46	4.6
1930	4	4	3	30	10.38	33.6242	132.341	40	4.3
1930	4	25	18	16	0.5	33.3722	131.345	0	4.5
1930	4	25	18	48	27.28	33.1508	131.435	0	4.1
1930	4	25	21	31	37.59	33.2318	131.358	0	4.5
1930	4	25	21	57	55.79	33.3608	131.349	0	4.3
1930	4	25	23	17	12.01	33.2737	131.175	16	4.3
1930	6	14	18	24	43.75	32.9145	129.589	39	4
1930	6	19	5	45	49.83	32.1172	131.917	0	4.7
1930	6	21	18	47	25.23	32.0817	132.42	0	4.8
1930	7	10	13	14	58.77	33.7968	132.434	86	3.9
1930	7	18	18	42	44.93	32.9908	130.958	5	4.3
1930	7	18	19	22	1.48	32.9305	130.89	6	4.6
1930	9	29	13	52	26.03	31.232	129.804	284	5
1930	10	7	5	51	11.52	33.5875	131.962	63	4.3
1930	10	21	14	25	18.39	33.46	132.25	77	4.8
1930	11	28	6	54	24.23	32.3032	131.12	136	4.3
1930	12	12	2	12	10.57	33.4602	131.706	84	4.3
1930	12	12	22	54	23.37	32.9657	130.867	18	4
1930	12	13	1	1	55.89	32.9407	130.903	14	4.3
1930	12	13	4	42	55.72	33.0435	130.799	10	4.3
1930	12	13	15	21	2.14	33.0463	130.718	0	4
1930	12	18	19	41	16.25	31.9857	129.05	7	4.5
1931	1	15	22	38	54.67	32.7903	130.49	3	4.8
1931	1	31	0	46	22.57	33.7595	132.332	50	4
1931	2	26	5	30	3.06	31.9875	132.356	3	4.6
1931	3	8	6	40	13.34	32.8753	131.888	40	4.1
1931	3	17	18	46	6.39	31.1827	130.54	148	4.7
1931	4	28	14	43	24.07	33.0937	131.054	6	4.3
1931	4	28	15	6	41.17	33.0533	131.084	11	4.3
1931	4	28	17	47	26.95	33.0885	131.066	8	4.3
1931	6	29	1	9	17.49	31.1112	131.008	0	4.5
1931	6	29	14	22	26.8	33.3318	132.12	44	4
1931	7	24	20	37	52.72	31.9037	131.816	0	4.3
1931	8	12	20	20	31.35	32.8565	130.57	7	3.8
1931	9	21	7	42	50.88	33.5553	131.938	84	4.3
1931	9	22	17	36	11.11	31.9505	131.94	35	4.7
1931	9	24	23	12	49.54	32.5705	130.624	17	3.8
1931	10	8	7	6	8.92	33.7032	132.181	71	4.1
1931	10	30	19	31	53.2	33.0408	131.979	75	4
1931	11	2	3	53	12	32.5	132	35	6.5
1931	11	2	6	30	49.23	32.2518	132.152	11	4.3
1931	11	2	17	32	8.41	32.0093	132.146	8	4.7
1931	11	2	19	3	4	31.899	132.01	35	7.5
1931	11	2	19	31	37.7	31.7152	132.118	13	4.8
1931	11	2	20	0	29.47	31.8063	132.216	5	6
1931	11	2	20	33	9.67	31.9855	132.064	14	4.9
1931	11	2	20	47	12.31	31.6988	132.124	19	5.4
1931	11	2	21	10	57.35	31.82	132.139	25	4.8
1931	11	2	22	45	9.76	31.7763	131.249	0	4.2
1931	11	3	0	15	13	32.2212	132.115	0	4.7
1931	11	3	0	48	10.35	31.6672	132.159	24	4.7
1931	11	3	4	34	5.95	32.0033	132.353	47	4.8
1931	11	3	5	49	44.87	31.9322	131.882	0	4.3
1931	11	3	9	41	13.44	32.0283	132.154	0	4.3
1931	11	4	0	24	8.93	32.2125	132.06	12	4.4
1931	11	14	13	29	22.09	33.5653	132.273	69	4.3
1931	11	16	21	38	58.31	32.5767	130.021	17	4.3
1931	12	15	8	50	28.63	32.4845	132.295	3	4.3
1931	12	19	2	45	45.19	31.765	131.71	0	4.8
1931	12	21	13	32	18.69	32.0628	132.019	0	4.2
1931	12	21	14	47	11.41	32.4865	130.488	0	5.3
1931	12	22	17	36	49.66	32.4345	130.502	9	4.2
1931	12	22	22	7	54.23	32.5037	130.502	15	5.3
1931	12	23	6	12	39.32	32.5057	130.576	20	4.3
1931	12	26	10	42	53.23	32.4943	130.529	17	5.5
1931	12	29	11	49	59.76	32.4882	130.529	12	4.5
1932	1	3	6	53	19.46	31.1443	131.633	36	4.8
1932	1	3	12	11	14.4	31.5732	131.368	47	4.3
1932	1	5	17	21	21.54	34.1538	131.735	26	4.1
1932	1	21	23	42	54.47	31.3523	130.765	162	4.8
1932	1	27	21	15	56.63	32.067	131.914	8	4.9
1932	1	28	3	41	45.77	32.62	131.899	0	4.3
1932	1	31	14	29	29.92	31.9773	131.871	30	4.4
1932	2	3	18	35	14.68	31.3815	129.376	61	4.4
1932	2	13	6	33	14.48	33.3688	132.181	0	4.2
1932	2	15	6	32	24.92	31.1022	130.583	137	4.7
1932	2	15	10	6	37.94	31.7878	132.125	50	4.2
1932	2	28	8	59	20.84	34.5208	132.031	1	4.4
1932	3	5	17	49	19.79	33.3353	132.097	55	4.2
1932	3	14	22	52	23.99	35.4387	123.404	0	4.7
1932	3	17	14	1	36.68	33.8692	130.304	27	4
1932	3	18	7	56	35.4	31.933	132.109	83	4.1
1932	4	22	4	1	23.59	32.6075	130.552	8	3.9
1932	5	3	8	29	12	31.5	131	35	5.8
1932	6	8	15	13	58	31.5	132	35	5.8
1932	6	8	19	54	0	31.5	132	35	5.8
1932	6	18	10	31	25.39	32.6162	132.091	0	5.3
1932	8	23	15	31	22.84	32.6905	130.831	17	3.8
1932	8	24	0	4	21.48	32.3037	132.171	0	4.5
1932	8	24	22	18	10.97	32.6132	130.584	122	4.1
1932	8	24	22	51	7.14	33.274	130.461	0	3.9
1932	8	26	22	52	55.02	31.283	131.329	0	4.5
1932	9	29	12	42	43.28	33.9732	130.5	8	4.4
1932	9	29	15	49	30.4	33.3713	132.348	5	4.1
1932	10	1	18	22	14.36	32.5828	130.471	7	3.8
1932	10	2	20	51	3.16	33.9118	130.535	22	4.2
1932	10	5	12	21	57.49	33.2278	132.101	72	4.1
1932	10	27	17	36	45.71	33.4555	131.648	60	4.2
1932	11	9	4	32	43.83	33.7673	132.396	59	4.1
1932	11	18	5	11	40	31	130.5	100	5.6
1932	11	29	15	21	49.2	32.6527	130.897	24	3.8
1932	11	30	5	14	57.18	32.1698	132.106	3	4.6
1932	12	21	14	54	28.2	32.8295	130.596	11	3.8
1932	12	30	5	33	22.89	32.805	131.333	121	4.1
1933	1	14	11	10	28.75	32.9182	130.995	5	4.4
1933	1	14	15	33	24.47	32.9057	131.026	5	4.2
1933	1	15	18	55	21.49	31.2458	131.223	0	4.6
1933	1	16	18	22	3.42	31.7362	129.935	0	4
1933	1	27	3	33	28.36	32.8593	131.06	0	4.2
1933	2	4	15	43	15.77	32.8565	130.978	9	3.8
1933	2	6	16	17	3.18	32.9663	131.024	11	4.5
1933	2	7	10	27	35.18	32.9685	131.06	0	4.5
1933	2	9	6	56	7.45	32.905	130.986	6	4.2
1933	2	11	4	50	43.88	32.9327	130.996	13	3.9
1933	2	12	9	45	55.51	32.7907	130.756	14	3.6
1933	2	13	22	1	7.94	32.9532	131.097	4	4.1
1933	2	17	4	20	49.96	32.0015	130.779	25	4.2
1933	3	10	16	29	24.45	32.721	130.545	20	3.7
1933	3	10	21	25	18.97	32.9382	130.876	7	3.9
1933	3	16	10	45	0.18	33.0317	130.873	14	4.1
1933	3	21	2	8	58.15	33.3708	132.024	49	4.2
1933	3	22	6	13	10.5	32.889	130.671	14	3.7
1933	3	22	8	18	16.99	32.9055	130.952	7	4.6
1933	3	23	5	49	32.64	32.9373	130.701	19	3.9
1933	3	25	21	50	20.83	32.8395	130.945	12	4.9
1933	3	26	10	36	29.65	32.9375	130.93	1	3.9
1933	3	26	12	59	26.12	33.0123	130.834	8	3.9
1933	3	29	12	50	54.32	31.1205	131.028	17	4.3
1933	4	2	21	44	15.31	32.9543	130.854	0	3.9
1933	4	8	20	54	25.55	32.7077	130.648	1	4.4
1933	4	11	7	15	21.44	32.0332	131.573	49	4.1
1933	4	13	12	52	57.47	32.9757	130.874	15	4.4
1933	4	13	14	14	34.82	33.011	130.907	7	4.1
1933	4	13	15	55	26.56	32.8653	130.587	13	3.6
1933	4	13	16	3	35.96	32.9228	130.828	6	3.7
1933	4	15	20	33	14.93	32.9665	130.786	0	3.6
1933	4	16	4	45	25.68	32.9918	130.886	5	4.1
1933	4	25	2	57	47.43	32.951	130.962	5	3.6
1933	4	25	3	1	10.82	32.9905	130.949	2	4
1933	5	5	20	38	20.37	33.0032	130.924	0	4.5
1933	5	5	20	54	37.14	32.9358	131.07	0	4.1
1933	5	5	20	56	30.36	32.8522	131.108	0	3.8
1933	5	5	21	4	3.05	32.9253	131.118	7	4.1
1933	5	5	21	41	30.41	32.9623	131.2	0	4.1
1933	5	7	20	44	14.81	31.2965	131.842	45	4.5
1933	5	11	13	29	55.14	31.5817	132.188	0	4.3
1933	5	15	10	11	10.17	32.9405	131.143	0	4.1
1933	5	15	10	17	45.44	32.9047	131.131	0	4.3
1933	5	16	15	32	4.64	31.1465	131.4	0	4.5
1933	5	23	5	44	4.93	31.6965	131.771	46	4.8
1933	5	24	1	51	50.19	31.1748	131.72	73	5
1933	5	25	3	39	33.4	32.31	131.847	3	4.1
1933	6	2	16	38	45	31	131.5	35	6.2
1933	6	3	19	32	38.39	31.166	131.31	0	4.5
1933	6	3	22	31	0.91	32.9648	131.108	14	4.2
1933	6	5	11	57	26.07	33.5072	132.362	47	4.1
1933	6	13	7	17	29.17	32.736	130.717	1	3.9
1933	6	16	19	43	21.99	33.9438	132.469	0	4.1
1933	7	10	1	55	56.28	33.3567	131.504	0	4.3
1933	7	10	2	0	18.27	33.4487	131.334	0	4
1933	7	15	1	3	35	43	131	530	5.8
1933	7	24	17	37	57	42.5	131	550	6
1933	8	16	13	10	35.37	32.7742	130.795	15	4.3
1933	8	19	3	48	37.36	32.8762	130.894	0	3.9
1933	8	29	15	39	38.35	33.1662	130.538	20	4.3
1933	9	1	16	23	21.55	32.958	130.598	0	3.9
1933	9	10	6	18	54.49	32.504	130.558	20	3.8
1933	9	10	6	54	15.34	32.5642	130.54	14	3.7
1933	9	18	22	25	9.97	31.5125	128.819	0	4.5
1933	9	24	22	49	16.75	33.4082	132.206	25	4.1
1933	9	27	0	58	53.78	32.8623	130.933	5	4.3
1933	9	27	2	39	34.82	31.8838	130.866	156	4.3
1933	9	29	22	58	42.71	32.9062	130.929	4	4.1
1933	10	2	4	24	4.31	32.8707	131.379	115	4.5
1933	10	2	21	52	28.35	32.8548	130.892	8	3.9
1933	10	4	19	59	54.79	31.9718	131.816	3	4.3
1933	10	6	6	32	8.67	32.7422	130.048	0	3.9
1933	10	21	13	44	10.41	32.9725	131.535	4	4.1
1933	10	23	14	46	0.14	32.0808	132.058	7	4.3
1933	11	1	21	3	42.09	33.0082	131.086	0	3.9
1933	11	6	16	25	9.4	32.7635	128.607	10	4.7
1933	11	10	2	21	40.76	32.7533	130.777	7	4.1
1933	11	10	22	1	10.93	32.759	130.746	21	3.4
1933	11	20	8	4	19.75	32.7923	130.831	9	3.9
1933	12	4	17	30	44.95	31.4397	132.126	0	5
1933	12	12	2	25	44.99	32.4418	130.125	0	4.1
1934	1	9	10	45	35.1	31.8242	132.139	8	4.3
1934	1	10	8	39	21.39	34.351	132.036	14	3.9
1934	1	15	6	36	14	33.012	130.891	9	3.9
1934	1	21	8	44	3.8	32.2003	131.288	92	4.5
1934	1	24	3	56	44.9	32.2332	131.697	0	4.5
1934	1	29	10	38	46.34	32.9935	130.896	15	5.1
1934	1	29	16	23	15.65	33.017	130.868	12	3.7
1934	1	31	9	53	50.9	32.9103	131.334	13	4.1
1934	2	22	12	51	15.66	31.1368	131.649	0	4.3
1934	3	13	10	18	7.49	31.7905	132.264	0	4.5
1934	3	30	23	53	59.55	31.7387	132.13	43	4.8
1934	4	6	9	22	14.14	32.6998	130.938	15	4.3
1934	4	10	15	54	11.17	33.6193	131.795	44	4.2
1934	4	18	20	56	31.19	32.1268	131.901	41	4.5
1934	4	28	11	1	21.64	33.5472	130.315	15	4.3
1934	5	11	9	0	19.09	33.6602	131.907	32	4.2
1934	5	13	9	15	38.19	34.4697	131.743	9	4.2
1934	5	17	22	57	3.06	33.5565	131.905	3	4
1934	5	18	20	17	29.26	32.7077	129.758	15	4.3
1934	5	30	16	1	33.78	31.847	130.591	201	4.5
1934	6	3	6	29	0.49	31.485	131.884	16	5.1
1934	6	6	8	53	39.64	32.9032	130.546	5	3.9
1934	6	7	22	31	59.02	32.9223	130.565	4	3.9
1934	6	19	17	52	18.04	32.6197	130.757	14	3.8
1934	6	24	23	59	6.66	33.1532	131.583	49	4.2
1934	6	27	5	34	16.93	33.3582	131.85	12	4.5
1934	7	1	14	11	8.29	32.3373	132.223	0	4
1934	7	10	15	58	10.58	32.0925	131.979	15	4.5
1934	7	27	11	57	50.96	30.9978	131.896	9	4.8
1934	8	4	1	38	41.93	33.2743	131.72	68	4
1934	8	20	17	24	23.13	34.0027	132.267	14	4.1
1934	8	22	21	57	56.73	31.0647	130.203	142	4.3
1934	9	1	8	5	30.58	33.7442	131.293	0	4.6
1934	9	1	11	44	51.81	32.0045	131.867	20	4.5
1934	9	12	23	27	8.67	31.104	130.224	40	4.6
1934	9	14	7	55	47.59	31.018	130.396	0	4.5
1934	9	15	4	36	40.02	31.1245	130.524	20	4.3
1934	9	16	10	29	33.12	32.9127	130.633	18	3.9
1934	10	7	16	50	57.73	31.0047	131.781	20	4.6
1934	10	14	22	48	5.19	31.8443	131.809	87	4.2
1934	10	18	13	43	46.18	32.0133	130.092	1	4.4
1934	10	23	16	46	14.32	32.6182	131.182	138	4.4
1934	10	27	21	39	21.24	33.1868	131.122	2	4.1
1934	10	28	2	4	40.48	33.1573	131.103	13	4.1
1934	11	14	21	17	56.23	32.0533	130.118	0	4
1934	12	3	12	26	55.41	32.1092	131.847	0	4.5
1934	12	13	8	37	17.22	31.269	131.656	0	4.2
1934	12	19	5	35	7.73	32.0905	131.696	0	4.5
1934	12	22	9	40	59.32	33.2965	132.419	31	4.2
1934	12	23	16	13	21.83	32.1245	131.827	0	4.4
1935	1	22	9	33	9.62	31.5783	129.431	2	4.8
1935	2	5	5	9	59.31	33.6982	132.305	82	4.2
1935	2	14	2	7	37.1	31.9483	132.01	17	4.1
1935	2	17	20	5	17.48	31.5952	131.392	66	4.1
1935	3	6	18	47	17.19	33.112	131.136	15	4
1935	3	7	19	41	11.78	33.0877	131.208	14	4.6
1935	3	8	1	1	52.67	33.0948	131.106	11	4.1
1935	3	8	1	27	58.27	33.1192	131.215	2	4.1
1935	3	8	5	24	17.74	32.853	130.925	27	4.2
1935	3	8	9	45	7.81	32.9738	130.978	29	4.3
1935	3	8	17	46	33.13	33.0007	131.146	20	3.9
1935	3	14	21	2	40.78	32.971	130.893	18	3.7
1935	3	19	22	4	19.44	33.186	131.166	4	3.9
1935	3	19	22	30	39.8	33.0945	131.166	9	4.1
1935	3	20	9	16	40.74	33.1703	131.208	2	4.1
1935	3	26	4	33	30.41	31.81	132.237	6	4.5
1935	3	29	8	47	51	43	131	550	6.2
1935	3	30	9	3	56.22	34.334	132.338	21	3.9
1935	4	14	19	49	17.39	32.7367	132.005	0	4.3
1935	4	17	15	56	45.55	32.8978	132.03	0	3.9
1935	4	21	23	27	52.73	34.5762	132.195	14	4.1
1935	4	28	22	32	1.67	31.0408	130.12	137	4.1
1935	5	8	5	8	1.68	33.5013	131.739	32	3.8
1935	5	18	13	9	35.49	31.359	131.505	138	4.5
1935	5	23	15	10	11.61	32.859	131.825	73	4.9
1935	6	30	0	46	51.26	32.011	131.436	11	3.9
1935	7	3	9	16	37.09	32.0615	131.386	11	4.4
1935	7	3	9	19	5.99	31.7863	131.175	8	4.7
1935	7	4	7	20	54.13	33.3892	132.102	33	3.8
1935	7	17	0	0	28.02	34.5863	131.03	20	5.3
1935	7	17	1	43	43.13	34.6075	131.011	11	4.3
1935	7	18	5	33	1.34	32.5172	132.024	40	3.9
1935	7	19	7	25	54.88	31.6458	130.861	24	4.1
1935	8	18	8	24	36.74	32.4178	132.36	5	4.4
1935	8	19	6	21	41.9	32.6158	130.423	0	3.9
1935	9	9	14	13	19.6	32.1885	130.119	13	4.9
1935	9	10	10	9	14.21	32.2477	130.149	13	4.1
1935	9	10	23	22	30.15	33.9418	132.087	27	4.1
1935	9	12	20	0	19.53	32.192	130.19	2	4.3
1935	9	14	16	58	13.15	32.2303	130.236	4	3.9
1935	10	2	18	27	46	31	130	120	5.6
1935	10	3	13	30	45.7	32.8232	131.703	7	4.1
1935	10	4	11	5	53.4	32.7705	131.574	0	3.9
1935	10	16	3	23	5.86	32.1593	130.121	12	4.3
1935	10	20	10	14	39.43	33.3005	131.966	16	4.1
1935	11	9	13	0	6.52	31.048	130.244	148	4.7
1935	11	23	9	14	25.46	33.3937	130.866	12	4.3
1935	11	25	12	37	11.41	31.9362	130.603	172	4.1
1935	12	19	12	55	4.38	33.3418	132.204	54	4.1
1935	12	28	12	29	24.99	32.0988	131.764	0	4.2
1936	1	1	2	50	47.12	32.8048	131.351	116	4.3
1936	1	15	10	16	10.29	32.9727	130.638	0	3.8
1936	1	19	2	22	51.5	32.4497	130.438	4	4.3
1936	1	30	21	51	21.86	31.4118	131.357	0	4.1
1936	2	1	3	52	43.85	42.9415	131.31	550	4.9
1936	2	6	17	0	24.01	34.247	132.269	0	3.9
1936	4	6	2	36	16.37	32.0367	131.851	60	4
1936	4	14	10	19	50.39	32.7973	131.662	2	4.4
1936	4	21	18	7	41.25	33.8738	132.345	0	3.9
1936	5	24	20	8	17.88	32.4977	130.583	6	4.3
1936	5	25	10	17	41.01	31.6483	131.266	35	4.5
1936	5	27	0	36	16.66	31.2683	130.769	113	4.5
1936	6	5	6	15	12.69	32.8203	131.764	4	3.9
1936	7	4	6	2	19.23	36.004	129.704	32	4.9
1936	7	12	0	58	10.14	32.7122	132.137	8	4.1
1936	7	26	14	44	11.54	33.5835	131.902	90	4.1
1936	8	27	14	23	45.32	32.0567	131.122	14	3.9
1936	10	10	23	12	11.77	32.9392	130.923	14	4.1
1936	11	2	18	37	7.67	32.9087	130.562	3	4.2
1936	11	5	20	15	13.96	32.3495	130.686	27	4.4
1936	11	7	1	23	45.44	33.1743	132.031	0	4.1
1936	11	14	11	7	27.57	31.7333	130.074	30	3.9
1936	11	28	17	20	12.38	34.3705	131.736	10	3.8
1937	1	4	19	30	53.47	33.1352	130.817	9	3.7
1937	1	5	16	0	17.23	32.737	130.683	3	4.4
1937	1	6	6	38	2	31.048	132.43	20	6.5
1937	1	6	6	51	55.51	31.0463	132.295	115	4.9
1937	1	6	6	52	59.81	31.2967	132.446	80	4.9
1937	1	6	10	2	22.98	31.9742	132.229	0	4.3
1937	1	8	23	49	38.83	31.2255	132.427	94	4.5
1937	1	9	18	21	37.75	31.477	131.71	41	4.1
1937	1	23	17	27	35.9	33.4273	132.336	72	4.2
1937	1	23	17	49	46.7	33.0758	131.454	109	4.8
1937	1	27	16	4	46	32.7855	130.814	9	5
1937	1	28	4	7	13.14	32.7455	130.78	9	3.6
1937	1	28	9	43	42.53	32.7082	130.711	0	5
1937	1	28	9	58	50.72	32.7283	130.727	1	3.9
1937	1	31	7	48	29.04	32.7292	130.718	10	3.7
1937	2	1	10	15	1.52	32.6658	130.651	9	4
1937	2	1	23	42	59.79	32.746	130.725	14	4.4
1937	2	4	19	20	24.35	33.5325	132.222	76	3.9
1937	2	4	19	29	5.64	33.5187	132.184	20	3.9
1937	2	6	10	23	41.2	31.7852	131.873	1	4.5
1937	2	8	21	18	22.65	33.4098	132.032	24	4.9
1937	2	11	12	12	37.8	32.0662	131.094	97	4.6
1937	2	12	16	28	42.88	32.4742	131.462	0	4.2
1937	2	14	10	5	15.92	33.1253	132.106	57	5
1937	2	21	13	6	57.38	32.7715	130.771	4	3.4
1937	2	26	22	54	29.92	33.3647	132.026	1	3.9
1937	2	27	23	41	58.1	33.862	132.116	63	5.7
1937	3	9	15	41	52.54	32.8398	130.938	7	4.2
1937	3	14	20	15	37.82	31.1137	131.41	45	4.5
1937	3	16	2	45	18.52	36.3418	126.521	0	4.1
1937	3	23	1	59	19.68	31.8265	131.998	0	4.8
1937	5	4	0	50	34.48	33.4763	131.965	38	4.8
1937	5	20	6	17	57.5	33.2998	132.097	52	4.1
1937	6	2	6	39	10.58	32.6918	130.749	12	3.8
1937	6	13	13	33	57.18	31.6357	131.948	0	4.7
1937	6	13	16	21	6.37	32.0127	131.538	16	4.5
1937	6	20	5	17	52.29	31.8223	131.617	6	4.6
1937	6	21	3	40	58.83	34.9553	132.311	0	4.1
1937	6	23	6	5	31.29	31.7305	131.218	28	4.2
1937	6	23	11	7	59.53	31.9045	131.163	23	4.6
1937	6	24	5	41	39.74	31.5093	131.53	52	5.1
1937	6	24	6	32	39.82	31.6532	131.459	35	4.3
1937	6	27	12	26	18.86	31.416	131.69	59	4.5
1937	7	3	22	50	56.25	31.4958	131.565	55	4.6
1937	7	9	13	8	5.88	32.6948	129.996	0	4.8
1937	7	9	20	27	49	32.5293	130.3	0	4.1
1937	7	12	18	54	31.81	31.5313	131.495	44	4.1
1937	7	14	17	50	21.3	31.7783	131.122	0	3.9
1937	7	29	17	34	33.97	32.7317	130.702	9	3.4
1937	8	8	5	46	35.37	30.9992	131.408	1	4.8
1937	8	12	16	59	28.58	31.7662	131.339	49	4.2
1937	8	20	5	31	47.86	31.3793	131.338	13	4.8
1937	8	22	14	28	42.5	31.8932	131.701	44	4.3
1937	8	27	3	54	10.92	31.2332	131.799	42	5.7
1937	8	29	16	6	23.19	31.1313	131.663	57	4.8
1937	9	7	15	3	56.37	32.9623	131.096	15	3.9
1937	9	8	19	8	25.35	32.1202	129.856	3	4.3
1937	9	9	17	22	22.42	33.7598	132.16	39	4.1
1937	9	19	9	52	18.47	33.0792	131.24	10	4.5
1937	9	21	6	18	46.68	33.4975	131.991	7	4.2
1937	9	24	0	44	12.7	32.7277	130.637	9	4.4
1937	10	2	0	18	13.45	32.134	130.052	2	4.3
1937	10	2	20	26	55.2	34.1123	130.16	0	4.1
1937	10	4	5	37	24.76	32.1148	131.805	23	4.7
1937	10	12	13	33	51.5	32.1297	129.81	11	4
1937	10	25	12	29	2.61	31.5195	131.136	0	4.3
1937	10	26	7	50	9.61	32.1017	129.824	5	4.3
1937	10	28	22	12	13.51	32.1052	129.863	6	4.3
1937	11	3	3	20	48.11	32.4127	131.769	0	4.1
1937	11	3	13	59	18.57	32.0123	131.776	4	4
1937	11	9	10	17	38.1	31.8657	131.002	112	4.3
1937	11	10	18	20	17.69	32.1967	132.055	0	4.4
1937	11	20	11	14	26.41	33.2777	131.408	115	3.9
1937	11	29	14	43	37.57	31.6828	132.018	82	4.1
1937	12	10	22	15	23	31.2618	131.978	9	4.5
1937	12	14	16	16	39.42	32.026	129.811	23	4.5
1937	12	15	5	42	48.1	32.0868	129.798	24	4.2
1937	12	15	23	27	28.02	34.788	131.396	24	4.3
1937	12	25	22	52	14.68	32.6542	132.344	56	5.3
1938	1	8	14	50	59.31	33.686	132.013	71	4.6
1938	1	19	14	12	53.39	31.5152	130.987	84	4.6
1938	1	20	1	49	8.39	31.8278	131.17	0	3.9
1938	1	23	3	21	7.46	32.7423	130.667	7	3.6
1938	1	27	15	7	58.48	31.4145	131.405	54	4.5
1938	2	8	17	15	35.07	32.8252	130.557	7	3.8
1938	2	15	17	32	40.56	32.5305	129.833	8	4.3
1938	2	19	1	22	14.95	31.1118	130.403	159	4.2
1938	2	28	7	42	47.29	31.9953	131.03	10	4.2
1938	3	1	15	0	4.87	31.5042	131.387	43	4.8
1938	3	5	2	9	0.85	32.0347	131.041	7	4.3
1938	3	7	23	18	35.24	31.4637	130.334	144	4.6
1938	3	17	5	39	33.53	33.727	132.248	2	4.3
1938	3	28	22	5	26.69	31.7683	130.23	0	4.9
1938	4	22	21	15	0.92	31.2522	130.316	149	4.1
1938	6	1	12	43	42.27	34.1865	132.406	46	3.7
1938	6	9	22	5	59.31	31.561	131.773	18	4.2
1938	8	10	18	9	37.03	31.0455	131.682	59	4.8
1938	8	12	12	0	29	33.2497	132.073	76	4.3
1938	8	13	7	25	15.18	32.8665	130.666	5	4.4
1938	8	22	9	46	27.08	35.271	127.701	11	4.8
1938	8	26	8	38	25.85	33.4747	131.76	8	4.3
1938	10	1	13	4	1.96	33.4	132.219	22	4.2
1938	10	8	8	59	48.16	32.7645	130.593	5	4
1938	10	8	17	17	4.72	32.8483	131.97	68	4.4
1938	10	13	1	59	28.01	33.734	132.262	27	3.9
1938	12	19	19	26	7.03	33.955	132.261	8	3.7
1938	12	30	5	56	50.1	31.5695	132.031	20	4.9
1939	1	3	2	13	1.16	32.7457	129.97	3	3.9
1939	1	10	10	4	0.7	36.4895	127.063	5	4.4
1939	1	22	1	19	37.08	32.5715	130.527	29	3.9
1939	2	19	2	44	59.69	31.1702	131.189	33	4.8
1939	2	27	0	49	37.14	33.0858	131.786	76	4.2
1939	3	18	4	18	39.91	32.4003	130.776	40	4
1939	3	20	12	22	28	32.508	131.69	25	6.7
1939	3	20	12	49	14.38	32.4742	131.869	18	4.2
1939	3	20	13	46	24.33	32.3358	131.802	44	4.4
1939	3	20	14	37	53.75	32.4955	131.644	48	4.8
1939	3	20	20	0	25.6	32.3983	132.004	59	4
1939	3	20	22	37	5.33	32.4437	131.707	4	4.7
1939	3	21	7	6	42.09	32.4505	131.809	6	4.3
1939	3	21	7	29	10.87	32.4725	131.829	34	4.6
1939	3	21	15	17	40.09	32.2738	131.564	40	4.1
1939	3	22	3	47	53.94	32.3515	131.809	29	4.3
1939	3	22	7	43	1.44	33.3137	132.18	64	4.3
1939	3	27	22	28	14.7	32.3215	131.837	31	4.3
1939	3	30	18	53	55.76	32.4767	131.74	5	4.5
1939	4	3	9	1	53.94	33.7243	132.236	12	4
1939	4	6	22	50	25.38	33.0972	132.086	37	3.7
1939	4	15	0	57	11.65	33.7565	131.721	94	4.6
1939	5	30	19	34	37.34	32.0402	131.063	104	4.8
1939	6	6	3	32	28.26	33.4563	132.329	5	3.6
1939	6	21	16	40	30.79	31.1738	131.196	0	4.8
1939	6	29	20	57	59.86	33.5298	131.827	74	4
1939	6	29	23	13	2.3	31.6818	132.218	55	4.8
1939	7	9	21	55	58	32.657	132.135	25	5.2
1939	7	11	15	54	41	32.7122	132.161	2	4.7
1939	7	30	15	31	9.83	32.7227	132.156	28	4.3
1939	8	4	7	30	20.56	33.4127	130.316	23	4.1
1939	8	31	14	7	53.77	36.3765	127.115	8	4.7
1939	9	1	20	17	36.14	34.1985	131.542	14	3.7
1939	9	2	9	35	58.29	32.772	132.166	0	4.3
1939	9	7	9	33	23.28	33.6087	132.184	59	3.7
1939	9	10	19	50	21.25	32.704	130.143	5	3.9
1939	9	24	10	3	56.47	32.7772	130.365	21	3.4
1939	10	24	6	23	2.81	31.4173	130.627	173	4.3
1939	10	26	5	2	58.89	32.816	132.073	22	4.5
1939	10	29	12	6	3.45	32.3658	132.025	54	4.1
1939	11	4	2	19	8.39	33.5558	132.435	4	3.6
1939	12	27	17	54	21.7	33.3928	130.785	4	4.1
1940	1	7	13	3	30.15	31.3983	131.539	24	4.3
1940	1	7	13	34	43.05	31.4813	131.27	0	4.3
1940	1	11	12	22	43.89	33.2965	131.353	0	3.9
1940	1	19	6	28	8.21	33.6105	131.99	58	4.1
1940	1	19	14	23	43	43	122	35	6.1
1940	1	29	2	52	46.52	32.6407	131.302	122	4.7
1940	2	4	4	31	47.48	33.5437	132.37	24	4.1
1940	2	10	11	32	52.47	31.3692	130.062	9	4
1940	2	22	20	19	3.78	33.1215	131.139	10	3.9
1940	2	23	2	57	40.01	34.2953	131.391	4	4.4
1940	2	28	5	47	39.29	32.6872	131.922	86	4.1
1940	3	2	4	6	56.14	34.2677	130.666	12	3.9
1940	3	4	9	39	11.27	33.5515	132.208	22	3.9
1940	3	26	17	46	29.09	31.312	131.346	0	4.5
1940	4	10	23	22	31.26	32.2712	131.854	0	4.2
1940	4	17	6	48	34.91	31.2085	129.975	139	4.4
1940	4	22	8	59	34.34	33.3452	132.369	37	4.1
1940	4	25	7	5	38.6	34.8098	131.896	33	3.6
1940	5	1	9	19	55.39	33.7098	132.045	60	4.2
1940	5	14	14	50	26.8	33.227	131.903	14	4.1
1940	6	5	22	35	40.04	33.2257	131.016	5	4.2
1940	6	12	17	6	28.89	33.5963	132.33	7	3.6
1940	7	2	2	35	33.95	33.388	131.905	1	4.1
1940	7	4	10	43	34.93	32.7753	131.997	38	3.8
1940	7	6	17	0	48.3	31.8603	132.175	11	4.6
1940	7	22	11	47	14.54	33.7133	131.043	14	4.1
1940	8	5	9	52	59.61	33.4952	132.272	7	4.4
1940	8	6	3	28	13.96	34.335	131.824	12	4.1
1940	8	14	0	36	48	36.019	132.28	10	7
1940	8	14	1	42	13.96	36.1327	132.204	0	4.8
1940	8	16	14	14	48.12	36.2965	132.18	6	4.8
1940	8	26	16	2	50.46	36.086	132.138	0	4.5
1940	9	29	22	4	50.65	34.0255	131.797	14	4.1
1940	10	17	1	5	2.04	31.8512	131.19	86	4.4
1940	10	19	0	0	47.74	31.8735	131.855	37	4.8
1940	11	1	8	51	6.64	33.4477	131.872	72	3.8
1940	11	4	15	8	43.91	32.6725	130.014	13	2.9
1940	11	10	19	5	12.64	31.976	132.049	53	4.7
1940	11	14	19	59	1.34	32.739	129.691	6	4.6
1940	12	4	20	14	43.75	33.7322	132.359	52	4.3
1940	12	6	10	22	4.05	33.2635	132.104	44	3.9
1940	12	14	10	40	9.76	31.2432	131.451	4	4.9
1941	1	13	23	8	1.73	32.6915	131.633	21	3.9
1941	1	18	4	34	23.66	31.7495	131.911	0	4.5
1941	1	23	19	3	15.34	31.3425	130.14	0	4.4
1941	1	27	10	45	18.07	31.6467	131.878	64	4.4
1941	1	29	1	53	5.88	33.6372	131.967	18	4.1
1941	2	4	0	40	42.61	32.3587	131.017	79	3.9
1941	2	27	23	14	14.77	31.5797	131.047	1	4.5
1941	3	7	16	16	27.01	33.42	132.288	23	4.1
1941	3	13	18	52	32.92	32.8632	130.78	21	3.8
1941	3	13	19	15	46.32	31.8257	131.813	0	3.8
1941	3	14	11	59	51.22	32.9042	130.921	5	4.1
1941	4	6	1	49	48	34.5	131.75	60	6
1941	4	8	4	47	37.77	34.5685	131.689	2	4
1941	4	10	16	20	42.11	32.5813	131.474	43	4.3
1941	4	17	15	19	10.34	34.5048	131.743	0	3.9
1941	5	6	23	56	44.79	32.5905	131.976	13	3.9
1941	5	8	1	41	12.19	32.346	131.949	0	3.9
1941	5	11	1	45	0.77	31.2078	131.744	1	4.3
1941	5	15	23	45	39.16	31.929	131.991	2	4.1
1941	5	26	15	35	6.84	32.7093	130.475	64	3.6
1941	6	21	4	36	0.7	33.2633	131.818	11	4
1941	7	11	1	50	28.65	33.4452	132.144	25	4.1
1941	7	14	22	26	1.29	33.6255	132.062	50	4.4
1941	7	20	0	13	14	32	131.75	35	6.2
1941	7	20	1	38	24.79	31.716	131.758	31	4.1
1941	7	20	4	54	55.29	31.803	131.628	36	3.9
1941	7	20	20	1	58.38	31.9733	131.795	0	4.3
1941	7	24	9	36	30.44	31.0682	131.618	0	4.9
1941	8	11	19	7	38.7	33.453	131.568	116	4
1941	10	1	5	46	59.37	32.1985	132.118	62	4.5
1941	10	25	7	40	21.43	32.5045	130.61	16	4.4
1941	10	26	10	10	51.59	32.5363	130.456	8	3.9
1941	10	31	23	8	37.14	32.557	129.329	0	4.7
1941	11	14	6	30	46.23	32.0677	132.191	47	4.6
1941	11	14	6	33	13.44	31.9575	132.23	54	5.3
1941	11	14	10	50	35.65	32.0592	132.214	15	5
1941	11	14	11	42	47.75	32.15	132.092	0	4.5
1941	11	14	12	13	51.33	32.0348	132.135	29	4.4
1941	11	14	13	24	11.52	31.7457	132.288	14	4.3
1941	11	14	15	34	12.91	31.801	132.214	11	4.3
1941	11	17	16	22	46.35	32.0837	132.071	0	4.2
1941	11	19	1	46	33	32.095	131.95	35	7.9
1941	11	19	2	51	22.39	32.14	131.994	0	4.8
1941	11	19	3	4	57.61	32.197	131.892	0	4.5
1941	11	19	3	56	32.3	31.983	132.202	49	3.9
1941	11	19	4	59	16.82	31.978	132.355	48	4.1
1941	11	19	6	30	44.89	31.7665	132.169	55	4.4
1941	11	19	9	57	50.44	32.1405	132.424	52	4.1
1941	11	19	15	33	41.78	32.3002	132.122	0	4
1941	11	19	15	35	8.13	33.2498	131.334	2	3.9
1941	11	19	19	54	39.08	33.2597	131.311	0	4.2
1941	11	20	8	28	43.28	31.7832	131.84	15	4.1
1941	11	20	9	32	38.23	31.9532	132.107	27	4.6
1941	11	20	14	27	10.85	32.061	131.801	39	4.5
1941	11	22	14	26	23.05	32.3177	132.405	18	4.4
1941	11	28	7	14	4.34	31.3787	131.155	57	4.4
1941	11	29	22	33	36.73	31.677	131.633	13	4.7
1941	11	30	3	4	48.28	32.6288	132.416	0	4.8
1941	12	1	9	34	43.31	31.9998	131.934	24	4.1
1941	12	5	4	22	55.36	32.4372	132.45	0	5
1941	12	12	10	38	2.62	33.0962	132.293	10	3.8
1941	12	15	17	18	37.73	42.1815	125.064	0	5.7
1942	1	8	15	57	0.94	31.5175	131.928	0	4.8
1942	1	25	5	54	38.52	32.0782	132.156	0	5.2
1942	2	3	11	32	28.05	33.0023	131.453	0	4.5
1942	2	9	17	21	6.9	32.6727	131.347	115	4.5
1942	2	18	8	20	47.68	31.7963	132.186	36	5
1942	2	22	9	47	14.51	33.5307	132.382	68	5.2
1942	2	25	16	42	23.94	33.837	131.764	41	4.2
1942	3	1	2	36	0.97	32.3207	131.72	0	4.5
1942	3	6	21	50	50.61	33.084	132.449	3	3.7
1942	3	7	6	16	44.87	31.847	131.834	52	4.3
1942	3	11	4	6	9.9	32.6112	132.056	3	5.2
1942	3	17	1	39	33.55	31.2478	130.031	140	4.5
1942	3	23	4	17	26.82	32.6818	132.227	24	4.3
1942	3	31	19	39	23.37	32.0668	131.945	3	4.3
1942	4	2	3	18	29.06	31.2037	130.724	132	4.6
1942	4	13	23	6	36.46	31.7857	131.832	48	5.7
1942	6	3	14	20	18.99	33.428	131.635	103	4.7
1942	6	8	1	59	40.31	31.1072	130.162	117	4.8
1942	6	20	7	28	3.96	31.0323	131.511	27	4.8
1942	7	4	11	38	26.64	32.9173	130.898	6	3.9
1942	7	9	20	24	30.42	31.991	131.207	0	4.1
1942	7	13	20	53	57.74	31.9853	129.948	5	4.3
1942	7	24	6	50	17.98	32.5863	131.814	59	4.4
1942	8	11	13	39	49.62	33.6547	132.299	20	4
1942	8	14	1	25	55.69	33.1303	131.44	101	4
1942	8	21	14	26	38.1	33.2007	131.396	17	4.1
1942	8	21	14	28	14.32	33.1243	131.232	3	4.3
1942	8	22	18	0	44.25	32.1332	132.349	7	5.9
1942	8	22	19	29	14.18	32.2552	132.33	15	4.8
1942	8	22	20	13	34.1	32.3415	132.358	7	4.8
1942	8	22	21	0	4.39	32.3903	132.26	0	4.6
1942	8	22	21	28	5.19	32.3058	132.34	2	4.4
1942	8	23	9	38	31.02	33.7077	132.229	44	4.1
1942	8	25	5	14	6.28	32.2318	132.285	13	4.3
1942	8	25	23	54	59.59	32.3313	132.195	0	5.7
1942	8	26	0	30	15.88	32.238	132.31	10	4.5
1942	8	28	0	36	22.14	32.3037	132.349	0	4.8
1942	8	28	23	2	36.69	32.371	132.21	0	4.3
1942	9	2	19	13	29.92	33.2167	131.347	0	4.3
1942	9	15	0	2	19.27	33.8297	130.295	0	4.4
1942	9	24	3	0	45.71	33.1533	132.101	7	4.5
1942	9	27	5	15	59.97	32.2163	132.401	14	4.4
1942	10	27	14	29	32.14	33.3228	132.177	42	5
1942	12	6	7	16	4	32.2392	132.046	6	4.1
1942	12	17	14	4	29.68	31.7625	131.788	5	4.4
1942	12	20	5	40	48.96	33.6927	131.71	1	4.3
1942	12	29	21	19	7.17	32.0773	131.389	0	3.9
1943	1	7	0	1	48.5	32.006	131.994	0	4.3
1943	2	10	22	44	0.95	32.7785	132.159	69	4.1
1943	3	19	15	57	45.71	31.949	132.106	18	4.9
1943	4	12	18	1	37.54	31.8367	131.941	33	5.3
1943	4	28	9	56	26.5	33.3165	132.132	24	4.4
1943	6	22	9	27	34.13	32.845	130.725	3	4.2
1943	6	24	19	27	16.99	33.7965	130.578	0	3.8
1943	7	3	2	19	54.12	32.1448	131.848	24	4.5
1943	7	7	17	13	1.58	31.6188	129.169	0	5.1
1943	8	8	0	4	28.81	34.6307	131.725	10	5
1943	8	9	4	27	55.87	34.551	131.896	8	4.9
1943	8	13	14	12	13.57	32.2518	131.596	92	4.6
1943	9	3	21	48	43.51	32.023	131.787	29	4
1943	9	4	1	20	46.44	34.5438	131.926	6	4.3
1943	9	13	0	54	39.37	31.608	131.652	34	4.8
1943	10	31	18	45	17.01	34.7388	131.138	40	4.7
1943	11	1	12	28	57.31	31.3473	130.154	128	4.1
1943	11	18	14	58	20.69	31.2497	129.42	25	4.8
1943	11	18	16	11	57.08	32.9705	131.909	52	4.9
1943	12	26	3	20	42.5	31.9858	132.117	0	5
1943	12	27	16	48	50.32	32.1478	131.891	0	4.7
1943	12	29	1	4	17.48	33.5895	132.142	43	4.4
1944	1	5	11	53	43.68	31.7058	131.975	35	5.4
1944	1	7	5	55	36.98	32.9778	131.383	2	4.8
1944	1	7	13	34	25.77	31.521	131.553	0	4.5
1944	1	27	23	8	27.54	33.5637	132.037	37	4
1944	2	16	11	23	3.81	33.0255	131.181	6	3.9
1944	2	16	11	24	52.15	33.0297	131.149	5	3.8
1944	3	13	4	15	37.06	33.0717	131.119	0	4.4
1944	3	25	13	30	14.31	32.9305	131.889	0	4.4
1944	4	7	3	29	52.03	31.789	131.469	54	4.5
1944	5	3	12	9	11.99	32.7562	132.313	45	4.3
1944	6	7	19	15	1.83	33.2642	131.839	65	5.7
1944	6	20	0	45	38.74	36.9362	123.144	0	5
1944	6	30	16	36	13.56	33.533	131.889	85	4.3
1944	7	3	18	0	37.48	33.6978	132.404	11	4.3
1944	7	9	12	46	48.98	32.4983	130.595	0	4.3
1944	7	14	10	14	42.67	34.0533	131.925	7	4.8
1944	7	23	0	2	30.59	33.5315	132.401	46	4.2
1944	8	13	10	36	50.7	32.8278	131.253	22	4.3
1944	8	21	9	27	46.21	32.394	131.7	50	4.4
1944	8	22	21	57	3.12	33.134	131.093	11	4.2
1944	8	31	15	43	29.27	32.0155	131.143	85	4.8
1944	9	3	21	54	35.07	32.8362	131.278	106	3.9
1944	9	19	0	26	11.67	33.1997	131.165	24	3.8
1944	10	29	9	56	7.87	32.6542	130.718	18	3.6
1944	12	19	23	8	52.96	38.8328	124.075	25	6.5
1944	12	19	23	9	3	39.887	124.15	35	6.6
1945	1	6	15	13	54.07	33.5302	132.356	13	4.5
1945	1	25	22	59	31.11	33.0077	131.161	8	4.3
1945	2	12	10	51	32.22	33.5152	131.406	102	4.3
1945	3	29	6	32	7.62	31.7123	128.952	43	4.6
1945	4	14	13	22	35.04	31.4785	131.975	5	5
1945	5	5	15	29	37.89	32.2378	132.419	44	4.7
1945	6	2	21	4	24.62	33.4953	131.336	124	4.2
1945	8	21	19	7	13.58	42.2273	131.686	650	5.8
1945	12	10	12	42	11.86	31.2242	129.094	3	5.3
1945	12	20	10	43	12.77	31.6262	131.25	100	4
1946	2	11	6	9	16.7	31.2175	131.662	18	5
1946	4	3	14	16	34.57	31.0415	132.207	119	4.8
1946	4	8	12	23	52.64	33.1773	131.196	12	4.8
1946	4	11	1	37	46.25	33.1372	131.078	4	4.3
1946	4	22	10	13	39.8	33.224	131.154	12	3.8
1946	5	1	19	1	54.12	31.5772	131.972	22	5.3
1946	5	1	19	12	47.27	31.4407	131.91	27	5
1946	5	10	11	12	19.44	31.5492	131.429	4	4.5
1946	5	25	20	41	50.14	31.0065	132.091	72	5.3
1946	5	30	3	34	1.67	33.2125	131.181	12	3.9
1946	6	1	0	0	41.62	32.3828	131.475	64	4.1
1946	6	5	14	3	22.53	33.2018	131.169	7	4.1
1946	6	6	19	13	26.09	33.196	131.079	0	4
1946	6	14	0	50	5.81	33.2238	130.622	0	3.6
1946	6	17	8	17	25.38	32.4218	129.844	0	4.3
1946	6	26	22	19	0.7	32.7967	131.38	126	4.1
1946	7	23	20	7	15.48	33.2562	130.914	1	3.8
1946	8	8	16	39	40.62	33.6227	132.376	0	4.3
1946	8	20	18	42	41.08	33.3517	132.316	42	5.6
1946	8	30	5	50	40.74	31.2338	129.569	0	5.1
1946	9	6	4	44	35.39	33.7118	132.365	11	4.4
1946	9	7	16	31	34.92	31.7532	131.029	7	4.1
1946	9	10	18	43	23.79	33.5365	131.467	0	4.4
1946	11	8	13	39	35.1	31.3452	129.864	2	4.5
1946	12	21	5	44	8.46	32.776	130.303	7	4
1946	12	22	3	41	3.86	32.7025	130.69	7	5
1946	12	22	11	22	1.44	32.7733	130.59	12	4.3
1946	12	23	6	15	11.98	32.9482	130.182	18	4.1
1946	12	25	6	15	33.81	32.5023	132.435	4	4.5
1946	12	25	15	20	11.44	32.9792	130.813	5	4.4
1946	12	25	19	5	23.22	32.7888	130.949	24	4.2
1947	1	7	19	56	10.81	31.7615	128.655	44	4.8
1947	1	10	13	58	28.57	34.8263	130.494	0	4.8
1947	1	10	19	42	37.89	33.2822	130.204	3	3.9
1947	1	13	10	53	42.95	32.9047	130.832	2	4.5
1947	1	13	21	59	29.65	33.1348	130.799	17	3.9
1947	1	14	11	53	21.37	32.941	130.651	0	4.1
1947	1	19	9	6	1.35	32.568	131.649	22	4.5
1947	3	5	22	14	21.1	32.7063	131.94	0	4.5
1947	3	9	20	29	9.41	34.7313	130.119	0	4.6
1947	3	19	17	36	20.98	32.0103	129.815	9	4.3
1947	4	6	6	30	49.57	35.0192	132.346	11	4.3
1947	4	9	3	13	52.56	31.8798	128.935	14	4.5
1947	4	26	13	59	56.12	32.6772	132.283	0	4.6
1947	5	3	4	16	59.97	31.3022	131.603	0	4.4
1947	5	9	23	5	37.3	33.3722	130.95	7	5.3
1947	5	11	2	51	18.18	33.318	131.031	13	4
1947	5	11	6	53	4.38	33.359	130.986	6	5
1947	5	11	14	0	48.25	33.1253	130.364	14	3.8
1947	5	14	19	57	50.27	33.4112	131.037	12	3.8
1947	5	15	19	54	30.21	32.9363	131.328	14	4.1
1947	5	20	16	44	4.01	33.2863	130.725	0	4.1
1947	8	6	23	49	29.76	33.5463	131.857	40	4.5
1947	8	12	8	43	17.86	33.431	132.335	24	4.7
1947	8	14	18	49	40.9	31.9978	131.563	46	4.8
1947	8	15	18	12	0.57	31.323	129.032	31	4.5
1947	8	25	18	33	24.89	34.6268	131.75	0	4.5
1947	9	18	2	46	48.83	32.4128	132.413	30	4.5
1947	9	24	8	44	2.78	33.3087	129.06	43	4.2
1947	9	24	18	7	47.27	31.7485	129.355	0	4.7
1947	10	8	3	36	46.7	31.2438	131.867	3	5
1947	10	11	2	30	59.19	31.029	131.634	55	5.3
1947	10	11	2	51	28.2	31.1398	131.657	16	5.3
1947	11	26	20	12	42.6	31.9308	131.869	18	4.7
1947	11	27	12	31	47.85	32.5828	129.909	3	4.5
1947	11	27	12	46	50.96	31.722	131.743	0	4.2
1947	11	28	18	42	27.72	31.0302	131.16	46	4.6
1947	12	25	10	2	25.57	33.67	131.466	81	4.1
1947	12	29	16	17	6.78	31.2745	130.837	139	4.8
1948	1	1	8	5	48.91	31.292	131.551	0	4.8
1948	1	7	11	45	55.85	33.5977	131.666	79	4.3
1948	1	10	10	58	35.73	32.7868	130.566	10	3.8
1948	1	22	4	22	57.72	31.0273	130.417	155	4.8
1948	2	6	3	53	12.93	31.2588	130.528	9	4.3
1948	2	15	9	19	34.68	32.6895	130.886	19	4.6
1948	3	8	4	53	46.29	31.6138	131.878	0	4.4
1948	3	24	13	4	33.87	32.8557	130.601	2	4.3
1948	4	21	10	52	35.55	32.161	132.08	28	4.6
1948	4	22	13	22	1.37	31.4362	131.604	53	4.8
1948	4	28	22	18	19.74	32.7417	132.262	4	4
1948	5	1	21	35	51.7	31.1242	132.321	14	4.8
1948	5	9	11	9	7	31.552	131.63	25	6.8
1948	5	9	11	43	26.27	31.5552	131.836	9	4.3
1948	5	9	12	35	45.46	31.3555	132.185	9	4.5
1948	5	9	15	23	23.59	31.745	132.099	13	4.7
1948	5	9	15	58	57.21	31.4762	131.808	24	4.8
1948	5	9	22	11	49.06	32.0658	131.272	87	4.3
1948	5	10	1	5	31.45	32.5292	131.759	0	4.4
1948	5	11	12	48	19.45	32.059	132	0	4.3
1948	5	11	21	0	38.72	32.1302	130.95	90	4.9
1948	6	21	2	15	8.02	32.7767	130.858	16	4.2
1948	6	21	4	18	33.28	32.8032	130.93	19	4.1
1948	6	29	19	14	34.22	33.7957	131.178	12	4.3
1948	7	7	0	27	44.49	32.02	132.321	13	4.5
1948	7	15	4	32	25.72	35.269	131.906	1	4.4
1948	7	15	5	58	17.12	33.3402	130.899	5	4.1
1948	7	15	17	42	6.22	32.1132	132.075	0	4.4
1948	8	2	10	14	33.85	33.2065	129.586	5	4.3
1948	8	4	7	45	51.8	32.8283	131.715	24	4
1948	8	17	8	23	10.76	31.9213	132.081	0	4.7
1948	8	30	20	52	43.05	31.612	131.751	17	4.7
1948	9	11	17	33	41.98	33.4935	132.1	0	4
1948	9	27	14	47	17.65	32.5482	130.542	16	4.2
1948	10	5	11	35	53.72	31.8857	131.447	42	4.3
1948	10	13	6	47	55.88	35.271	130.801	0	4.1
1948	10	15	0	59	9.11	33.0843	131.48	99	4.9
1948	10	27	4	52	25.05	31.159	131.387	19	5.1
1948	11	2	13	35	48.24	31.866	130.442	0	3.9
1948	11	4	1	0	40.22	32.2695	131.755	40	4.3
1948	11	23	21	45	34.5	33.2387	131.988	81	3.9
1948	11	29	15	34	42.99	31.2452	130.528	123	4.1
1948	12	12	16	24	21.08	31.9817	132.288	23	4.4
1949	1	7	19	40	13.12	32.6418	130.805	14	4.1
1949	1	12	18	57	25.2	32.5232	130.646	0	4.5
1949	1	15	1	3	29.5	32.9175	130.703	0	4.2
1949	3	20	3	19	27.2	31.2757	130.68	165	5.6
1949	4	3	0	33	59.52	31.4993	131.46	56	4.4
1949	4	5	18	27	8	41.643	131.34	574	6.7
1949	4	13	5	22	21.85	32.1352	132.226	0	4.5
1949	4	13	7	50	58.58	32.2205	132.171	4	4.1
1949	4	20	3	5	8.1	31.865	131.657	0	3.9
1949	4	29	21	28	39.36	31.7828	131.946	15	5
1949	6	8	9	49	41.17	31.3845	130.099	168	4.5
1949	6	12	17	4	7.99	31.5545	131.952	6	4.1
1949	6	27	14	19	46.75	32.3167	130.311	29	4.5
1949	8	2	11	23	15.51	31.8335	132.082	12	4.6
1949	8	10	12	31	32.41	31.0918	131.511	9	4.6
1949	8	23	4	1	12.66	32.5203	130.661	0	4.8
1949	8	26	20	0	14.39	32.2845	131.553	7	4
1949	10	3	10	43	40.76	33.8595	132.465	46	4
1949	10	5	2	52	57.81	33.0248	132.015	44	4.7
1949	11	6	13	0	4.06	31.6062	131.979	8	4.8
1949	11	16	10	10	11.38	31.2693	131.831	4	4.7
1949	11	16	10	41	21.53	31.3363	131.67	0	4.5
1949	11	16	12	50	42.99	31.2527	131.738	0	4.5
1949	11	19	13	2	40.72	33.5505	132.282	33	4.5
1950	1	23	20	14	55.49	35.474	131.248	8	4.7
1950	2	8	2	2	3.44	31.157	130.204	138	4.8
1950	2	21	4	27	51.18	31.9732	131.97	0	4.1
1950	3	31	15	0	18.86	33.614	132.077	14	4.2
1950	3	31	20	14	15.73	32.7675	130.87	0	4.1
1950	4	28	5	15	22.2	33.8393	132.078	44	4.4
1950	4	29	20	29	46.26	33.5023	132.075	6	4.1
1950	5	7	3	17	27.75	31.3838	130.675	164	4.3
1950	5	17	20	46	51	39.31	130.66	579	6.7
1950	5	27	11	50	44.54	33.544	132.07	15	4.2
1950	6	1	1	30	12.79	33.1833	130.611	14	4.3
1950	6	3	6	4	23.14	33.8602	132.249	21	3.9
1950	6	12	22	27	3.25	32.0912	130.981	1	4.5
1950	6	25	16	37	56.73	32.8433	130.655	16	4.2
1950	7	4	10	54	19.15	32.8903	132.274	0	3.8
1950	7	12	1	49	59.57	32.2318	132.282	12	4.3
1950	7	23	14	29	35.42	35.0538	131.126	0	4.4
1950	7	23	17	28	27.02	31.2483	131.978	19	5
1950	7	29	5	49	55.73	34.1463	129.924	0	4.1
1950	8	30	4	47	24.9	33.7453	132.348	4	3.9
1950	9	16	21	48	41.55	32.8313	131.393	133	5.3
1950	9	24	1	0	15.91	31.8025	129.12	14	4.8
1950	10	1	8	54	25.28	33.3863	131.976	58	4.1
1950	10	28	3	31	18.41	32.5088	132.199	4	4.3
1950	12	24	14	10	12.29	32.0398	131.724	27	5.2
1950	12	24	14	16	10.55	32.0025	131.899	0	4.9
1950	12	24	18	16	17.81	31.809	132.023	17	4.9
1950	12	30	1	22	1.51	32.8882	131.631	52	4.5
1951	1	1	13	16	23.32	32.0333	131.941	5	4.3
1951	1	6	7	33	10.79	32.01	131.273	8	4
1951	1	11	9	18	18.73	31.6757	131.517	36	4.8
1951	1	16	22	53	40.11	33.9227	129.431	14	4.1
1951	1	17	5	22	36.68	31.8673	131.878	27	4.8
1951	2	6	18	12	23.64	31.6533	131.691	27	4.5
1951	2	7	4	45	12.66	32.3223	129.874	18	4.3
1951	2	15	16	11	24.19	32.7192	130.168	12	5.1
1951	2	15	16	44	49.11	32.7298	130.235	13	4
1951	2	15	17	37	1.12	32.7308	130.179	0	4.1
1951	2	15	18	27	21.5	32.739	130.191	0	3.9
1951	2	19	3	22	7.69	32.0857	132.033	8	4.5
1951	2	19	13	48	30.56	32.7153	130.105	8	4.2
1951	2	24	19	41	37.24	33.6477	132.031	53	3.9
1951	3	7	0	15	48.78	31.0192	129.321	0	4.6
1951	3	7	0	19	35.31	32.3945	129.77	25	4.3
1951	3	24	9	59	59.99	33.4725	132.178	50	3.9
1951	3	27	11	19	30.49	32.5272	130.532	0	4
1951	4	26	3	30	1.65	31.2047	130.359	154	5.2
1951	5	15	9	41	57.89	32.2853	128.627	30	4.4
1951	6	19	3	16	8.71	32.6723	130.103	1	3.9
1951	6	20	17	38	10.42	33.3827	131.487	103	4.2
1951	7	2	23	56	24.56	32.3102	132.383	2	4.2
1951	7	31	4	28	46.37	31.626	131.665	1	4
1951	8	18	0	30	8.22	33.5382	132.368	26	4.2
1951	8	27	12	33	36.86	32.5557	130.268	14	4.2
1951	9	19	9	38	7.62	32.8663	130.746	1	3.9
1951	10	9	10	51	5.24	33.0895	130.793	25	3.8
1951	11	8	16	1	39.45	33.0127	132.425	29	4.1
1951	12	10	14	19	14.57	31.3317	131.738	79	4
1951	12	11	18	10	57.35	31.8112	131.952	31	4.3
1951	12	19	20	0	17.21	32.142	131.748	0	4.2
1952	1	30	20	44	18.18	31.0678	131.913	73	4.5
1952	2	7	15	28	53.4	32.5268	131.981	7	4.6
1952	2	8	3	23	55.15	32.6958	129.863	3	3.4
1952	2	14	4	26	24.92	31.6372	131.472	0	3.8
1952	3	19	18	4	18	38.872	125.83	35	6.3
1952	3	19	18	4	51.4	39.436	128.619	0	6
1952	4	14	13	42	14.58	32.539	131.533	160	4.3
1952	4	24	0	56	41	38.596	125.59	30	5.6
1952	5	6	14	44	59.5	31.1273	130.55	170	4.8
1952	5	16	12	37	0.42	32.829	130.859	20	3.7
1952	6	3	18	6	59.61	31.075	130.131	147	4.5
1952	6	13	9	47	29.25	33.247	132.016	38	4
1952	6	17	10	44	8.9	32.5993	131.165	133	4.3
1952	6	22	7	43	34.26	33.5952	132.121	56	4.1
1952	7	4	6	26	42.92	32.333	131.962	23	4.1
1952	7	26	22	32	51.69	31.0475	130.145	163	5.1
1952	7	27	10	17	51.83	31.3313	130.774	145	4.5
1952	8	5	20	6	11.01	31.337	131.932	20	4.9
1952	8	9	14	20	3.21	33.5065	131.874	72	4.4
1952	8	20	15	38	2.48	32.0325	132.152	4	4.8
1952	9	8	20	46	13.44	33.5945	132.413	14	3.9
1952	9	12	22	0	46.22	32.6475	128.991	10	4.3
1952	9	22	21	32	38.26	31.0978	131.47	0	4.8
1952	10	25	18	7	30.78	33.9052	131.903	4	4
1952	12	31	2	34	24.95	31.7543	132.082	73	4.5
1953	1	8	12	35	13.44	31.5862	132.066	4	4.8
1953	1	18	5	47	36.04	31.9183	132.107	32	5
1953	1	23	11	47	57.35	33.1862	132.129	62	5.2
1953	2	2	16	24	47.01	32.7858	130.478	0	3.4
1953	2	15	7	31	55.24	33.6563	131.783	109	4.3
1953	2	23	19	18	31.67	31.717	131.756	22	4.9
1953	4	13	13	48	25.99	31.2208	131.707	28	4.8
1953	4	19	3	52	20.3	33.8923	132.391	54	4.3
1953	5	1	12	10	48.01	31.0643	131.328	0	4.9
1953	5	24	19	51	37.22	32.9568	130.859	4	4.1
1953	6	8	10	14	49.2	32.3215	132.358	0	4.3
1953	7	18	3	29	38.97	32.8258	130.863	8	4.2
1953	7	22	21	29	35.3	33.028	131.458	119	4.5
1953	8	9	3	51	27.35	32.7217	131.344	116	4.5
1953	10	28	11	8	34.27	31.6888	129.218	5	5.3
1953	10	28	11	20	5.64	31.5637	129.23	14	5.3
1953	10	31	0	6	0.12	31.7923	129.193	0	5.2
1953	11	4	15	5	15.81	39.2938	129.7	598	6
1953	11	14	11	23	24.2	31.2315	131.071	77	4.5
1953	11	27	4	25	54.55	31.8937	131.948	18	5
1953	12	29	1	4	19.43	34.5285	132.375	11	4.3
1954	2	24	2	32	41.57	32.0025	130.953	0	4.3
1954	2	24	3	28	19.72	31.9498	130.941	21	5
1954	3	6	0	17	53.48	31.1975	131.388	38	4.7
1954	3	23	14	25	42.96	32.5817	132.086	25	4.9
1954	4	20	10	17	53.52	31.1328	131.336	18	4.5
1954	5	27	15	50	13.84	31.6877	131.765	19	5.2
1954	7	12	4	51	45.5	32.6263	131.177	154	4.6
1954	7	21	17	7	18.75	33.6945	132.398	46	4.5
1954	10	8	16	51	20.83	31.1385	130.62	148	4.7
1954	10	20	2	29	18.7	31.2112	129.933	8	4.8
1954	10	20	19	22	16.44	32.8793	131.99	52	4.3
1954	10	30	13	34	7.14	33.6835	132.317	36	4.1
1954	11	19	14	56	2	40.776	132.05	552	6.3
1955	2	6	12	55	3.39	32.7253	130.146	0	3.6
1955	3	7	6	59	35.69	33.3173	132.112	56	4.1
1955	4	17	10	13	32.63	33.3018	130.097	0	4.6
1955	4	23	15	7	30.63	32.2822	131.93	39	4.3
1955	5	29	14	36	27.19	31.7713	131.582	26	4.5
1955	5	31	23	19	12.11	32.5482	129.87	9	4
1955	10	11	5	35	38.85	31.6315	131.78	19	5.2
1955	10	15	13	45	28.04	32.8328	130.617	0	3
1955	10	15	14	12	51.33	32.7997	130.601	2	4.6
1955	11	22	21	10	3.62	32.8403	131.884	51	4.6
1956	1	1	1	59	14.92	32.6182	131.981	45	4.5
1956	1	30	14	45	6.48	33.6782	132.324	53	4.9
1956	3	5	15	43	48.49	33.5803	132.273	32	4.1
1956	3	28	11	41	10.58	32.5732	130.734	8	4
1956	3	28	23	20	22.11	32.861	130.77	10	3.9
1956	4	10	22	8	13.43	32.0442	131.279	60	4.1
1956	6	8	3	19	16.28	31.8175	131.774	22	5
1956	7	1	10	48	28.92	32.4962	132.453	18	4.6
1956	8	10	5	35	0.1	32.6203	132.19	0	5
1956	8	23	5	12	10.13	32.6103	132.274	12	4.7
1956	9	7	7	45	29.64	31.0278	131.966	53	5
1956	10	5	19	34	12.83	33.156	131.62	97	4.5
1956	10	12	21	46	38.6	32.6177	130.014	9	3.9
1956	10	13	6	37	26.61	32.8615	130.482	0	3.7
1956	10	16	3	59	28.39	32.7987	130.482	0	3.8
1956	10	24	10	1	30.28	32.0915	132.064	6	4.7
1956	11	2	20	34	22.81	33.7198	132.371	46	4.4
1956	11	20	19	32	26.98	31.4707	132.325	56	4.8
1957	1	9	6	14	29.55	32.7382	130.486	2	3.8
1957	3	19	11	55	1.38	31.959	132.089	7	4.8
1957	4	28	20	5	30.04	32.9245	130.347	12	4
1957	5	30	15	25	44.57	32.5793	130.908	19	4.7
1957	6	25	9	34	17.68	31.7437	131.642	43	4.7
1957	7	9	23	45	40.85	33.1625	131.522	100	4.4
1957	11	4	22	10	50.33	33.5077	132.34	47	4.3
1957	11	11	20	25	12.9	32.6718	131.997	40	4.5
1957	12	25	10	48	17.01	32.6003	129.993	2	3.9
1958	1	7	11	38	35.95	34.5365	131.762	11	4.6
1958	2	8	6	37	13.98	31.4915	132.074	25	5
1958	2	27	10	13	44.3	33.0355	130.432	19	3.8
1958	3	14	15	18	57.06	32.7083	130.826	15	4.5
1958	3	30	20	12	37.35	32.842	130.578	9	3.6
1958	5	15	5	32	7.94	32.858	132.265	35	4.7
1958	5	26	2	40	51	31.39	129.77	15	5.6
1958	6	7	23	47	7.17	33.2658	130.184	14	3.9
1958	6	15	5	22	28.37	31.703	132.049	15	4.3
1958	6	19	22	49	51	32.9502	130.351	19	4.8
1958	6	21	4	17	10.07	31.3413	129.594	9	5.3
1958	6	25	3	36	39.34	31.2793	131.544	0	4.6
1958	7	13	17	7	49.33	33.813	132.392	54	4.3
1958	9	5	1	2	36.06	31.724	131.714	27	4.8
1958	9	8	23	53	19	33.771	131.83	80	5.5
1958	9	11	4	3	17.14	32.7722	130.125	3	4.3
1958	9	15	4	42	13.51	31.7408	131.987	28	5.5
1958	11	7	3	53	23.07	32.8593	130.144	8	3.6
1958	12	19	1	24	35.61	32.7213	130.107	7	3.6
1958	12	21	4	32	52.71	31.0108	131.517	10	4.8
1958	12	30	19	48	2.63	32.8023	130.805	0	4.1
1959	1	24	3	31	31.97	33.6952	132.283	53	4.3
1959	2	1	6	22	3.68	31.3812	130.494	166	4.8
1959	4	15	7	10	55.29	31.801	129.387	13	5
1959	4	28	17	18	5.7	31.7513	129.425	11	5
1959	6	2	9	47	22	31.539	131.85	35	5.8
1959	6	4	15	37	6.16	31.277	131.188	66	4.2
1959	7	1	12	29	46.7	31.0643	131.512	38	4.3
1959	7	7	17	21	53.93	32.9912	130.342	4	4.2
1959	9	9	1	5	36.65	31.5007	131.864	28	5
1959	9	19	5	11	59.42	32.8917	130.837	9	4.4
1959	9	19	20	20	33.05	32.5425	129.945	21	3.4
1959	10	3	5	50	18.57	31.7452	129.364	0	5.3
1959	10	29	23	30	27	42.725	131.16	562	5.9
1959	12	7	17	13	7.79	33.8043	132.427	59	4.1
1960	1	19	12	10	54.01	31.9588	131.548	31	4.2
1960	2	5	17	43	35.9	31.8043	132.047	24	5.3
1960	3	4	12	53	11	31.173	130.48	132	6.3
1960	5	2	2	57	50.05	33.1927	130.534	14	4.3
1960	5	11	8	17	59	33.9	131.82	93	4.5
1960	7	2	21	44	22.11	41.2818	132.285	569	5.3
1960	7	30	0	47	22.24	33.0077	130.366	8	4.1
1960	9	4	10	13	27.61	32.0542	132.042	13	5
1960	9	26	20	36	23	32.5	131.9	0	5.3
1960	10	8	14	53	7	40.09	129.89	608	6.3
1960	10	9	22	7	25.29	40.397	130.016	598	4.8
1960	10	13	21	55	17.25	33.5777	132.333	32	4.3
1960	10	15	0	26	18.09	31.0907	131.531	15	4.9
1960	11	7	22	23	11.12	32.3328	132.15	35	5.3
1960	12	31	4	9	21.48	31.84	131.701	31	4.6
1961	2	20	23	44	1.85	32.9733	130.36	18	4.3
1961	2	27	3	10	4.91	31.645	131.887	37	6.7
1961	2	27	3	10	52	31.739	131.48	35	7.5
1961	2	27	15	30	1.4	31.7	131.803	0	4.6
1961	3	1	23	54	5.55	31.6033	131.483	29	4.5
1961	3	16	7	16	3.47	32.0183	130.69	0	5.1
1961	3	18	15	22	4.27	31.99	130.77	4	5
1961	3	18	17	57	5.52	31.9733	130.797	4	4.5
1961	3	30	2	24	2.88	32.935	131.903	54	4.3
1961	5	3	11	32	3.81	33.0817	130.488	4	4.1
1961	6	7	3	55	3.44	33.115	130.488	2	3.8
1961	7	10	21	38	2.73	33.1	130.473	0	4
1961	8	1	19	30	2.45	32.975	131.443	122	4.7
1961	8	11	13	27	15	31.67	132.12	0	5
1961	8	11	15	8	1.63	31.8583	132.153	37	5.3
1961	8	15	7	5	5	31.59	131.63	35	5.8
1961	8	26	21	28	1.36	32.6433	130.033	9	3.6
1961	9	19	15	15	5.72	32.68	130.07	4	3.4
1961	10	11	7	40	4.17	33.0217	130.505	8	4
1961	10	13	18	53	0.31	33.4567	132.128	71	4.3
1961	10	15	0	8	9	35.03	131.48	40	4.6
1961	11	9	20	20	4.4	33.11	131.117	4	3.9
1961	11	27	14	57	16	31.381	131.46	65	6.2
1961	12	11	13	57	5.34	32.805	130.747	3	4.1
1962	3	13	0	21	0.76	32.9067	130.712	0	3.8
1962	3	29	12	38	1.03	32.8667	130.822	3	4.3
1962	3	30	2	0	5.3	32.825	130.833	4	3.6
1962	4	13	15	41	3.69	32.9933	130.358	7	4.3
1962	4	15	19	12	2.41	32.7833	130.863	10	3
1962	4	23	4	15	31	32.16	130.45	171	5.5
1962	4	25	4	9	4.89	32.865	130.723	4	4.1
1962	5	18	23	20	5.79	31.3383	131.327	50	4.8
1962	6	28	13	13	5.67	31.2	131.245	58	5
1962	7	25	17	6	3.99	31.93	131.102	0	4.1
1962	7	25	18	18	0.14	32.1033	132	0	4.8
1962	7	31	14	9	1.8	32.4433	132.45	30	5.2
1962	7	31	14	9	26	32.4	131.64	89	4.9
1962	7	31	14	33	0.98	32.23	132.467	3	4.5
1962	7	31	17	8	48	32.5	132.1	0	4.9
1962	9	24	19	21	3.4	32.92	131.958	47	4.4
1962	9	25	11	37	1.61	33.8917	131.77	2	4.8
1962	10	10	16	50	1.72	31.09	131.937	19	4.8
1962	10	15	0	8	5.61	31.6833	132.183	16	5.3
1962	10	15	0	9	2	31.637	131.59	30	5.9
1962	11	7	0	38	0.75	31.17	131.513	38	4.5
1962	12	4	17	16	4	36.1	123.5	33	4.2
1962	12	19	2	42	4.56	32.9567	130.623	1	3.8
1962	12	28	13	0	3.87	31.8083	131.147	0	4.7
1962	12	28	16	14	3.83	31.495	131.635	42	4.2
1963	1	9	0	46	4.56	31.1883	130.443	159	5.3
1963	1	9	0	46	46	31.27	130.19	177	5.3
1963	1	27	12	52	4.65	34.8567	132.072	30	2.6
1963	2	16	23	54	1.5	32.88	131.987	0	4.1
1963	3	13	18	9	0.47	33.4267	132.407	56	4.3
1963	3	16	23	32	3.98	31.135	131.432	63	4.9
1963	3	29	17	59	5.76	31.81	129.51	0	4.8
1963	3	31	21	26	5	35.13	132.4	0	5
1963	4	1	0	2	18	35.1	132.43	0	4.9
1963	7	20	10	4	2.42	32.67	129.75	4	4.6
1963	8	28	18	22	0.35	32.835	130.76	9	3.8
1963	9	6	15	3	4.78	36.595	130.715	33	5.7
1963	9	6	15	3	53	36.341	130.66	20	6.1
1963	9	7	10	16	5.41	36.2717	130.873	12	5.9
1963	9	7	10	16	58	36.383	130.54	27	6.1
1963	9	10	3	10	5.03	32.3533	129.87	8	4
1963	9	19	8	23	5.27	32.8333	130.838	8	4.5
1963	9	20	3	21	1.42	32.8033	130.848	7	3.7
1963	9	21	6	31	2.89	32.8183	130.875	2	3.6
1963	10	4	8	24	3.46	32.1533	132.13	1	6
1963	10	4	8	24	37	32.052	131.73	35	6.6
1963	10	4	9	27	5.32	31.8683	132.105	9	5.4
1963	10	4	9	27	53	31.77	131.17	0	4.8
1963	10	5	16	34	0.56	32.1917	131.98	0	5
1963	10	19	23	27	5.04	32.0983	131.992	23	4.6
1963	11	19	13	37	5.82	39.54	129.707	587	4.9
1963	11	21	1	57	1.09	31.19	132.207	62	5
1963	11	30	8	26	5.71	32.8867	132.245	69	4.4
1963	12	9	4	23	5.64	32.9817	130.788	10	4.3
1963	12	9	8	53	1.85	32.7483	130.89	44	3.9
1963	12	10	9	56	0.9	32.0867	131.893	0	4.8
1963	12	11	18	22	3.22	31.33	130.455	158	4.6
1963	12	16	16	59	4.74	31.9033	131.898	50	4.8
1963	12	20	21	55	1.21	31.135	131.205	77	4.8
1964	1	2	20	36	16.44	33.0377	130.407	26	4.1
1964	1	5	18	18	15.3	32.5897	132.283	30	4.2
1964	1	25	2	17	49	38.676	129.58	573	5.5
1964	3	3	22	38	19.33	32.8387	130.859	4	3.6
1964	3	12	3	23	20	31.96	132.4	21	5
1964	4	12	21	14	54	33.495	132.06	68	4.9
1964	4	29	11	11	36	32.147	129.1	13	5.1
1964	6	24	21	56	22	32.203	129.15	7	4.9
1964	6	29	16	33	5.48	32.2067	129.102	4	4.3
1964	7	4	5	9	5.61	32.1582	128.932	8	4.3
1964	7	10	19	50	46.26	33.3655	132.242	61	4.4
1964	10	2	10	24	42	31.309	130.57	155	4.6
1964	10	11	18	18	30.43	31.9348	130.275	4	4.6
1964	10	17	15	34	50	42.414	130.89	500	4.6
1964	10	27	11	8	3.48	32.5668	132.307	2	4.3
1964	11	1	3	43	57.49	32.2468	131.96	0	4.5
1964	11	8	20	42	23.47	32.0698	131.629	32	4.5
1964	11	14	12	56	7	33.468	132.08	70	5.8
1964	12	2	3	38	3.85	33.0217	130.373	9	4.1
1964	12	12	1	4	5.79	38.97	130.225	565	5.2
1964	12	12	1	5	0	38.845	130.31	556	5.5
1965	1	3	13	26	46	31.5	129.8	20	4.5
1965	1	5	4	40	2.58	31.025	129.893	77	4.5
1965	1	6	23	14	20.83	32.0835	131.23	0	3.9
1965	1	27	21	22	34	33.7	132.2	40	4.2
1965	1	28	19	42	34.68	32.9258	130.798	8	3.8
1965	2	7	0	7	0	33.1	130.4	0	4.2
1965	2	7	1	12	40.16	31.4953	131.992	28	4.1
1965	2	10	10	24	21	33.7	132.3	40	4.2
1965	2	11	13	31	28.99	32.8998	130.414	0	3.8
1965	2	19	13	34	3	31.725	131.76	31	4.5
1965	2	24	16	52	49.33	31.7217	132.068	10	4.4
1965	2	24	21	9	45.34	33.7293	132.288	15	3.9
1965	2	27	5	29	17.32	31.934	131.079	0	4.1
1965	3	4	12	36	35.64	31.2605	131.604	0	4.3
1965	3	24	12	51	45	33.2	130	40	4.3
1965	3	28	17	41	9	31.667	131.69	24	5
1965	4	6	2	4	58.9	31.6503	131.973	32	4.5
1965	4	21	20	30	43.54	31.495	132.144	53	4.5
1965	4	22	7	20	30.25	32.1093	129.442	0	4.1
1965	4	26	12	7	22	32.8	130.7	20	4.1
1965	4	28	20	24	11.82	32.2277	129.821	2	4.2
1965	4	28	20	26	22	32.2	128.7	0	4.4
1965	4	28	20	26	25.69	32.242	129.804	14	4.3
1965	4	28	20	29	2.33	32.2582	129.707	14	4.3
1965	4	28	21	11	26.61	32.2978	129.832	0	4.3
1965	5	2	23	13	6	31.564	131.8	27	4.6
1965	5	19	3	4	44.46	31.5117	131.6	26	4.1
1965	5	30	8	40	46.71	31.6705	131.57	21	4.3
1965	6	4	21	3	33.51	33.104	130.488	22	3.9
1965	6	12	15	19	22	41.849	131.45	500	4.7
1965	6	14	3	22	13.64	32.8792	130.557	8	3.8
1965	7	5	3	19	59	32	132.1	0	4.5
1965	7	11	11	30	0	32.4212	131.617	40	4
1965	7	12	7	48	39.38	32.4128	130.877	1	3.9
1965	7	13	3	50	59	33.927	132.21	57	4.9
1965	7	13	23	3	42	33	130.4	20	4.1
1965	7	16	16	56	22	33.2	131.9	40	4
1965	7	19	3	50	0	31.5932	132.088	40	4.2
1965	7	27	5	32	0.6	31.0008	131.567	0	4.3
1965	8	2	3	18	35.88	32.2688	131.307	73	3.9
1965	8	7	3	15	12	41.32	131.37	568	5.3
1965	8	7	16	3	43.48	32.299	132.073	3	4
1965	8	24	14	39	31.74	33.0035	130.344	16	3.7
1965	8	28	0	14	11	33.1	130.4	20	4
1965	8	28	11	24	22.35	31.2367	130.626	162	4.3
1965	9	6	17	21	45.29	31.0422	131.568	18	4.4
1965	9	22	21	49	47	31.984	131.77	30	5.5
1965	9	25	0	10	44	32.1	129.4	20	4.7
1965	10	9	7	53	19.94	32.6637	130.999	6	3.6
1965	10	10	5	11	0.06	33.0237	130.514	2	3.6
1965	10	16	0	32	1.69	31.4138	131.572	38	4.3
1965	10	16	18	9	40	33.1	130.4	20	4.2
1965	10	16	19	21	0.79	33.1018	130.471	28	3.8
1965	10	18	10	24	8.09	33.0153	130.494	14	3.6
1965	10	21	15	51	51.53	33.2237	132.43	43	3.8
1965	11	4	5	31	53.45	31.917	132.049	0	4.2
1965	11	4	13	34	43.81	31.282	128.861	23	4.5
1965	11	5	14	31	41.87	33.8415	132.386	53	3.8
1965	11	7	17	29	28.82	32.428	131.798	16	3.9
1965	11	14	9	3	35	33.017	130.93	3	4.7
1965	11	26	10	17	33	32.9	130.8	0	4.4
1965	11	28	0	6	58.65	31.6073	131.707	41	4.1
1965	11	30	8	40	46.14	33.0788	130.214	22	3.9
1965	12	8	14	25	12	32.582	130.58	9	4.8
1965	12	14	7	2	14.36	31.51	131.806	3	3.9
1965	12	17	0	49	28.92	31.3665	131.754	60	4.1
1965	12	18	21	25	26.1	34.5657	131.87	3	4.3
1965	12	24	5	41	58.23	33.046	130.216	26	4
1965	12	24	10	19	25.21	33.0838	130.184	19	3.8
1966	1	1	18	58	28	31.036	131.4	32	4.6
1966	1	15	3	8	31.54	32.9518	129.932	25	3.9
1966	1	17	7	13	5.43	31.958	131.907	43	3.9
1966	1	21	0	21	13	31.972	131.67	33	5.1
1966	1	24	17	27	4.1	33.0478	130.347	0	3.7
1966	2	6	17	53	16.96	35.298	131.997	0	4.2
1966	2	22	11	0	44.32	31.2222	130.107	6	4.4
1966	2	22	11	8	58.67	31.1618	130.516	0	4.1
1966	2	22	11	38	45	31.344	130.07	10	5.1
1966	2	22	21	12	44.02	31.2233	130.203	0	4.3
1966	2	24	0	53	51.3	33.1922	130.595	24	3.9
1966	2	24	8	10	8.89	32.5718	131.58	60	4.4
1966	2	28	3	22	54.84	32.9913	130.312	3	3.8
1966	2	28	16	39	46	31.163	130.42	150	5.1
1966	3	14	5	46	5.67	32.988	130.493	11	3.6
1966	4	10	0	24	54.47	32.6822	131.807	36	3.9
1966	4	26	3	17	35	33	130.2	20	4.4
1966	4	29	1	22	44	32.992	131.99	56	4.2
1966	5	7	7	41	3.87	32.7295	131.154	154	4.3
1966	5	9	17	46	7.16	33.1885	130.571	0	3.8
1966	5	27	14	39	1	32.2	131.3	0	4.3
1966	5	28	6	35	29.19	32.467	132.229	23	4.2
1966	5	31	8	24	13.41	33.1965	130.009	8	3.8
1966	6	5	16	4	14.08	33.5697	131.708	99	4.1
1966	6	11	20	34	31	32.9255	130.68	11	4.1
1966	6	12	5	24	20.83	31.9883	131.785	30	4.1
1966	6	12	7	43	56.67	32.0298	131.825	20	4.3
1966	6	23	5	15	38.82	33.815	131.883	73	3.9
1966	7	6	3	32	4	32.937	130.12	12	3.9
1966	7	10	13	11	59.9	32.5978	131.75	24	3.9
1966	7	12	1	15	7.79	33.0347	130.314	21	3.8
1966	7	16	0	51	32.99	32.7963	130.231	12	3.9
1966	7	16	1	39	48.7	32.7542	130.212	16	3.9
1966	7	17	2	55	3.37	32.7498	129.964	8	4
1966	8	1	8	2	14	33	130.2	0	4.1
1966	8	2	19	48	15.52	32.565	130.667	12	3.8
1966	8	4	4	1	25	31.254	131.72	28	4.8
1966	8	5	18	32	21	31.219	130.16	10	4.5
1966	8	12	2	9	23.57	31.1605	131.259	25	4.5
1966	8	18	15	49	41	32.9	130.1	0	4.3
1966	8	20	23	51	16.16	32.9765	130.422	20	3.6
1966	8	25	9	32	50	32.181	132.28	24	4.6
1966	8	29	9	53	0.82	33.0657	130.385	10	3.6
1966	9	25	3	22	30	32.4848	131.478	0	3.9
1966	10	15	5	13	8.79	33.0885	130.481	0	3.8
1966	11	1	20	32	13	31.476	131.67	33	4.8
1966	11	2	9	21	56	31.108	131.25	52	5
1966	11	5	15	43	4.53	33.3065	132.169	13	3.9
1966	11	7	3	32	3.57	33.1777	130.469	0	3.9
1966	11	12	21	1	44	33.033	130.25	14	5.4
1966	11	16	11	31	28.83	33.1218	130.416	0	3.8
1966	11	23	5	57	8.96	32.6097	131.676	0	3.9
1966	12	5	16	23	5	32.208	131.78	24	4.9
1966	12	22	1	51	36.06	33.0243	130.373	0	3.6
1966	12	29	20	42	17	32.11	132.4	26	4.4
1966	12	30	19	40	19.77	32.2548	132.223	72	4.2
1967	1	15	9	46	27.63	33.0568	130.316	22	3.8
1967	1	19	12	59	57.28	32.704	132.132	32	4.1
1967	1	30	18	16	1.3	31.943	132.075	31	4.3
1967	2	1	20	3	42	33.3	132.3	40	4.2
1967	2	3	7	16	43	33.6	132.1	30	4.1
1967	2	4	1	22	52.84	32.593	132.199	26	3.9
1967	2	4	3	2	41.6	32.0725	132.159	0	4.2
1967	2	4	4	6	10	32.082	132	51	4.4
1967	2	16	22	18	14.49	34.6817	131.996	10	3.4
1967	2	17	16	12	53	32.799	130.84	12	4.1
1967	2	20	14	26	36.08	31.591	132.039	0	4.1
1967	2	20	20	56	51	35.231	128.91	10	4.8
1967	3	2	12	25	25.67	31.0108	131.594	16	4.8
1967	3	21	1	13	51.42	31.2008	130.753	172	4.1
1967	4	8	20	51	1.77	31.5248	131.937	10	4.1
1967	4	12	5	7	14.91	33.3542	130.9	7	3.7
1967	4	25	0	12	50	42.312	131.2	534	4.9
1967	4	28	4	37	46.19	33.1278	130.514	3	3.9
1967	5	7	2	53	12.7	32.8065	130.669	9	3.9
1967	5	10	23	39	11.27	33.1953	130.463	14	3.6
1967	5	17	9	26	25.7	33.7638	132.462	52	4
1967	5	25	5	8	23.51	32.9162	130.723	0	3.9
1967	6	17	1	15	44.74	32.8543	130.608	7	3.8
1967	6	19	21	43	24	32.799	130.56	12	4
1967	6	24	18	25	40	34.595	122.5	35	4.7
1967	7	3	5	34	38	31.216	130.28	182	5.4
1967	7	5	14	47	52.46	32.607	131.354	88	4.4
1967	7	7	8	15	58	32.571	131.13	157	5.2
1967	7	7	10	24	27.44	31.9443	132.401	19	4.2
1967	7	8	6	11	40.55	32.3452	130.393	6	3.9
1967	7	13	0	55	46	32.7	132.1	0	4.1
1967	7	13	1	4	21.26	32.8895	130.626	0	3.6
1967	8	5	4	40	13.9	31.3202	130.503	0	3.8
1967	8	5	5	13	58.08	31.4272	130.548	0	3.8
1967	8	5	20	17	13.38	31.2512	130.69	15	3.9
1967	8	8	2	35	48.29	31.2303	130.566	0	3.8
1967	8	16	18	42	57.12	31.9383	129.305	10	4.3
1967	8	21	15	27	4	31.454	131.74	33	4.6
1967	8	21	15	27	26.49	32.523	131.38	110	4.5
1967	8	23	2	33	34.29	33.0043	130.294	3	3.7
1967	9	13	19	42	44.35	33.1198	130.483	0	3.6
1967	10	1	19	10	17	33.09	130.34	18	3.8
1967	10	10	19	59	35.58	31.9297	131.875	32	4.1
1967	10	26	6	14	22	33	130.3	20	3.8
1967	10	30	17	29	50.59	33.1045	130.44	0	3.7
1967	10	31	5	48	47	32.9	132	0	4
1967	11	7	9	6	10	33.439	130.88	10	4.2
1967	11	16	5	52	0	32.277	129.75	6	4.7
1967	11	17	13	42	31	32.112	129.78	4	4.3
1967	11	18	22	39	6	32.5	132.1	0	4.3
1967	11	20	2	9	54.82	33.0675	130.468	2	3.7
1967	11	28	11	36	56	32.151	130.84	129	5.7
1967	12	18	23	59	0	32.1	131.9	10	4.2
1967	12	19	3	12	25.27	33.135	130.458	0	3.8
1968	1	9	23	47	14	32.4808	132.31	0	4.3
1968	1	31	8	24	28.39	32.3272	131.121	108	4
1968	2	3	21	11	5.55	32.9657	130.25	25	4.3
1968	2	12	16	32	2.34	33.5528	132.116	69	4.1
1968	2	21	8	51	41	32.043	130.73	7	5.1
1968	2	21	9	6	48.18	32.0653	130.79	0	4
1968	2	21	9	12	50.26	32.057	130.735	0	4.2
1968	2	21	10	4	3.23	32.0453	130.758	0	4.4
1968	2	21	10	44	53	32.048	130.7	10	5.4
1968	2	21	11	6	38.23	32.1617	130.89	1	4.1
1968	2	21	12	51	40.66	32.0428	130.733	0	4.3
1968	2	21	12	57	56.99	32.0188	130.681	14	3.8
1968	2	21	14	36	11.06	31.9962	130.709	0	3.9
1968	2	21	16	5	11.05	31.9817	130.714	0	3.8
1968	2	21	16	36	45.46	31.989	130.759	1	4.3
1968	2	21	17	8	47.92	32.0315	130.78	0	4.5
1968	2	21	20	56	42.49	32.0428	130.709	4	4.2
1968	2	21	21	33	23.71	32.0202	130.795	19	3.9
1968	2	22	6	23	10.47	31.2013	130.642	165	4.3
1968	2	22	8	18	3	32.0738	130.795	1	4.1
1968	2	22	18	27	52.36	32.1142	130.849	0	4.1
1968	2	22	18	55	50.95	32.064	130.771	13	4.3
1968	2	22	19	19	7	32.044	130.72	2	5.1
1968	2	22	19	32	8.09	32.0763	130.823	0	4.4
1968	2	22	19	34	15.38	32.039	130.755	0	4.3
1968	2	22	19	35	13.9	32.0278	130.793	0	4.2
1968	2	22	20	34	2.11	32.1513	130.857	0	3.8
1968	2	22	22	21	4.91	32.0838	130.834	0	4.3
1968	2	22	22	38	41.41	32.0395	130.735	21	3.9
1968	2	24	1	10	21.98	32.0853	130.843	0	4
1968	2	25	17	49	40	32.004	130.66	10	4.7
1968	2	27	8	20	41.25	32.0447	130.752	27	3.9
1968	2	27	23	22	1.17	32.0703	130.833	13	3.9
1968	2	28	9	32	37.43	32.0062	130.774	4	3.8
1968	2	28	15	26	51.81	32.0758	130.758	0	3.8
1968	2	29	22	31	43.45	32.0533	130.786	0	3.8
1968	2	29	22	34	7.56	32.0418	130.77	1	3.9
1968	3	3	16	31	31.78	32.0915	130.81	4	3.8
1968	3	6	0	4	55.97	32.0428	130.828	2	4.2
1968	3	12	19	51	17.07	32.0327	130.756	11	3.8
1968	3	19	13	19	10.16	32.0437	130.821	0	4.3
1968	3	21	10	33	54.22	32.0772	130.749	0	4.2
1968	3	25	0	58	52	32.123	130.72	10	5.1
1968	3	25	1	14	8.05	32.0852	130.832	0	4.2
1968	3	25	1	14	42.62	32.0795	130.832	0	4.3
1968	3	25	1	19	33	31.9	130.7	20	4.5
1968	3	25	1	21	1	32.022	130.73	0	5.1
1968	3	25	1	34	0.41	31.9152	130.7	20	4.3
1968	3	25	1	38	49.54	32.0787	130.808	12	4.2
1968	3	25	2	28	14.54	32.0643	130.833	0	3.9
1968	3	25	3	56	0.45	32.0332	130.768	1	4.2
1968	3	25	13	21	7.59	32.093	130.804	0	4.2
1968	3	25	16	46	3.91	32.0168	130.728	0	3.8
1968	3	26	16	32	59.22	32.056	131.957	33	4.2
1968	3	26	22	6	1.55	32.0905	130.866	0	4.1
1968	3	27	2	39	33.5	32.089	130.798	0	3.9
1968	3	28	15	51	31.21	32.0572	130.838	0	4.5
1968	3	28	16	14	18.14	32.0802	130.85	0	3.8
1968	3	28	17	58	4.2	32.0163	130.811	18	4.1
1968	3	29	11	9	26.2	32.9778	130.23	18	3.8
1968	3	30	0	32	7.46	32.0262	130.768	24	3.9
1968	3	30	3	48	43.06	31.1428	130.784	0	3.9
1968	3	30	12	22	41.26	32.0513	130.805	1	3.9
1968	3	30	20	7	29.58	31.1345	130.739	1	4
1968	4	1	9	42	5	32.499	132.31	26	6.4
1968	4	1	10	16	39.63	32.4953	132.298	12	4.1
1968	4	1	11	29	36.94	32.5313	131.901	30	4.1
1968	4	1	16	13	19	32.238	132.15	33	6
1968	4	1	20	7	51.16	31.0508	132.063	3	4.4
1968	4	2	8	33	51.57	32.3692	132.13	0	4.1
1968	4	3	11	8	29.4	32.1537	131.995	0	4.3
1968	4	5	2	22	37.61	32.0742	130.86	0	4.2
1968	4	5	4	30	10.93	32.075	130.852	19	4.1
1968	4	5	6	37	51.76	32.2888	131.028	10	3.8
1968	4	5	7	49	52.11	32.432	132.075	12	4.1
1968	4	5	7	57	29.34	32.1343	130.882	10	4.1
1968	4	5	12	16	57.91	32.0947	130.854	0	4.1
1968	4	5	13	2	40.85	32.5442	132.357	24	4.1
1968	4	6	3	49	8.92	32.1618	131.888	27	3.9
1968	4	6	3	50	19.75	32.1382	131.966	0	4
1968	4	6	17	1	21.96	32.0458	132.33	4	4.1
1968	4	6	17	15	51.14	31.9583	132.119	45	4.1
1968	4	6	19	14	55.5	31.9455	130.747	4	3.8
1968	4	7	1	49	5.8	32.1132	130.877	0	4
1968	4	7	7	17	43.02	32.1085	130.86	0	4
1968	4	8	2	25	29.79	32.0777	130.788	0	3.9
1968	4	11	15	46	31	42.328	131.19	552	5.2
1968	4	13	13	7	46.65	32.4283	132.022	14	4
1968	4	15	11	17	2.01	32.0143	130.776	16	4.1
1968	4	15	11	19	51.13	32.1803	130.93	0	4.2
1968	4	16	22	4	11.37	32.9852	130.316	2	3.6
1968	4	17	14	53	55.71	32.6678	132.373	0	3.9
1968	4	18	0	14	9.09	32.0538	130.626	0	3.8
1968	4	20	5	3	35.83	32.0663	130.865	4	4.1
1968	4	20	15	13	18.79	32.0663	130.766	0	3.8
1968	4	20	18	48	55.52	31.0092	131.883	0	4.6
1968	5	1	20	56	43.08	32.1445	130.842	10	3.9
1968	5	1	21	54	38	32.106	130.74	10	4.7
1968	5	3	0	18	11.65	32.0093	130.763	4	4
1968	5	3	7	51	12.63	32.013	130.783	0	4.1
1968	5	3	15	45	46.54	32.666	132.325	0	3.9
1968	5	4	7	44	48.99	32.7242	130.773	12	4
1968	5	4	19	45	39.91	32.6538	132.388	0	3.9
1968	5	12	17	14	39.25	33.4038	132.006	78	4.1
1968	5	19	20	8	58.73	31.3738	131.551	28	4.2
1968	5	19	21	5	29.15	31.2437	132.004	25	4.8
1968	5	19	23	38	54.32	31.2985	131.679	0	4.3
1968	5	21	23	30	31.07	32.5437	132.451	21	3.9
1968	5	26	4	8	41.47	32.2397	131.542	0	3.8
1968	5	28	13	6	39	32.353	132.46	30	4.9
1968	5	29	3	51	18.09	31.5568	130.659	11	4.2
1968	5	30	20	41	55.62	32.0935	130.834	0	4.3
1968	6	6	19	33	39.65	32.0377	130.749	7	3.8
1968	6	15	13	21	23.65	31.6397	130.631	0	4.1
1968	6	18	19	1	30.7	32.0263	130.752	0	4.2
1968	7	5	12	48	41.55	32.0378	130.768	5	4.1
1968	7	5	12	49	16.25	32.0453	130.766	2	4.1
1968	7	5	12	50	23.63	32.0388	130.816	0	4.3
1968	7	16	22	9	18	32.2	131.6	0	4.5
1968	7	30	11	41	13.92	32.0967	130.851	0	3.8
1968	8	6	1	17	7	33.25	132.22	48	6.4
1968	8	6	3	32	39	33.3	132.3	30	4.3
1968	8	6	5	51	21	33.317	132.39	41	5
1968	8	6	8	38	36.72	33.226	132.399	39	4.3
1968	8	6	10	42	16.96	33.265	132.432	38	3.9
1968	8	6	11	34	39	33.295	132.39	41	5.2
1968	8	6	12	3	41.25	33.1823	132.382	33	4
1968	8	6	12	43	42.01	33.2008	132.413	36	3.8
1968	8	6	13	21	5	33.338	132.41	44	5.4
1968	8	6	14	24	57	33.351	132.37	41	4.3
1968	8	7	18	13	30.72	33.2905	132.415	39	4.3
1968	8	7	23	32	27.86	33.4248	132.418	32	3.9
1968	8	8	2	44	4	33.24	132.35	43	4.9
1968	8	8	4	20	14	33.415	132.38	46	4.3
1968	8	8	20	28	12	33.334	132.4	41	4.4
1968	8	9	12	58	40.53	33.3678	132.402	43	3.9
1968	8	10	15	57	34.5	32.7388	130.038	0	4.1
1968	8	11	1	21	16	33.4	132.3	30	4.3
1968	8	12	18	40	23.4	33.041	130.309	14	3.9
1968	8	13	20	22	13.98	32.0663	130.689	0	4.4
1968	8	13	21	39	20.6	32.6722	130.019	10	4.6
1968	8	14	22	16	16.47	32.6757	130.03	6	4.2
1968	8	19	20	0	18.65	31.7728	131.983	25	4.3
1968	8	20	14	41	43.84	31.6873	131.988	10	4.5
1968	8	23	12	22	59.83	32.7672	130.234	0	4.3
1968	8	23	13	13	57.25	32.7108	130.235	0	4.1
1968	8	23	22	5	54	33.328	132.36	46	5
1968	8	26	5	50	24	33.2	132.3	40	4.3
1968	9	5	16	39	44.1	31.133	130.358	168	4.3
1968	9	6	9	45	26.54	33.566	131.823	82	4.2
1968	9	7	4	22	49	31.035	131.88	31	6
1968	9	26	17	2	35	33.4	132.3	20	4.3
1968	9	28	19	48	43	32.316	132.18	26	4.6
1968	10	3	16	59	2.7	32.5895	132.402	0	4.1
1968	10	5	2	40	9.98	32.236	131.209	85	3.8
1968	10	5	22	9	57.94	32.0867	131.898	54	4.1
1968	10	21	12	37	55.26	33.9962	131.873	6	4.1
1968	10	21	21	5	18.46	32.9582	130.226	24	3.9
1968	10	24	18	16	47.68	31.2725	131.863	26	4.6
1968	10	24	18	58	6.84	31.3152	131.731	30	4.5
1968	10	27	22	15	49	33.772	132.34	42	4.5
1968	10	29	6	46	51.42	33.0787	131.995	0	4.1
1968	10	30	3	58	44.93	32.4282	131.047	127	3.9
1968	11	2	16	16	14.72	32.864	130.768	0	3.9
1968	11	3	11	32	31.2	32.995	130.254	13	3.8
1968	11	11	21	27	54.7	32.9827	130.26	22	3.9
1968	11	14	21	11	56	31.616	131.72	34	5.4
1968	11	15	5	54	13	31.571	131.88	27	4.9
1968	11	19	1	19	42.36	32.2867	131.673	40	4
1968	11	29	9	19	43.1	32.5562	132.387	31	4.1
1968	12	7	13	18	15.8	33.3698	132.123	59	3.9
1968	12	9	23	27	59.34	32.7062	130.055	3	3.6
1968	12	13	8	54	19.6	32.9633	130.226	28	3.8
1968	12	25	21	35	37.25	31.1712	130.41	162	4.1
1969	1	1	9	18	22.53	32.3373	132.126	0	4.2
1969	1	6	14	41	10.8	32.7155	130.752	9	3.8
1969	1	8	12	28	1.92	31.4695	132.263	36	4.6
1969	1	8	18	36	20.34	32.9797	130.287	11	4.1
1969	1	18	2	54	31.34	31.5242	131.376	39	4.1
1969	1	23	22	42	44	31.68	131.73	10	4.4
1969	1	23	23	51	52.35	31.7625	131.987	0	4.1
1969	1	26	8	39	12.63	32.078	130.826	0	4.1
1969	1	28	16	10	17.81	33.7832	132.451	46	3.7
1969	1	30	7	15	35	32.637	132.21	36	4.9
1969	2	5	15	9	17.26	32.9995	130.278	10	4.2
1969	2	5	20	26	30.69	31.5198	131.837	15	4.2
1969	2	8	15	28	23	31.502	129.04	11	4.9
1969	2	13	1	42	13.49	31.0183	130.648	131	3.9
1969	2	14	21	42	9.79	32.684	130.079	5	4.3
1969	2	14	21	47	26.53	32.6683	130.081	0	4.3
1969	2	16	3	58	41.88	31.6705	132.069	18	4.3
1969	2	20	10	33	38.04	31.1537	131.331	3	4.3
1969	2	28	6	5	48	33.596	132.04	66	4.9
1969	3	19	21	32	30.15	32.1243	132.16	0	4.1
1969	3	22	22	14	3.01	32.9823	130.29	13	3.9
1969	3	26	1	35	11.98	32.7348	130.232	0	3.4
1969	3	26	3	58	4.12	32.551	132.343	10	3.8
1969	3	26	5	24	47	32.173	131.89	32	4.9
1969	4	10	23	54	6	42.055	131.17	563	5.5
1969	4	14	17	3	22.93	33.525	132.33	48	3.9
1969	4	17	19	18	50.44	31.5738	131.934	25	4.4
1969	4	21	16	19	27	32.152	132	26	6.3
1969	4	21	16	37	25.33	32.1562	131.976	39	4.3
1969	4	21	17	5	15.77	32.1143	132.028	0	4.1
1969	4	21	18	30	20.7	32.0972	132.007	0	4.3
1969	4	21	19	1	15.81	32.0998	132.071	0	4.1
1969	4	21	19	8	50.95	32.1047	132.034	0	4.1
1969	4	21	19	26	8	31.948	132.21	6	4.5
1969	4	21	19	28	26	31.955	132.25	9	4.6
1969	4	21	19	59	26	32.035	132.14	26	4.9
1969	4	21	20	8	36.81	32.116	132.015	0	4
1969	4	22	1	22	9.97	31.9338	132.216	26	4.1
1969	4	22	8	19	30.59	32.0383	132.255	0	4.3
1969	4	22	8	35	16.45	32.0577	132.226	0	4.2
1969	4	24	7	44	33.52	32.133	132.204	7	4.4
1969	5	2	2	1	7.75	32.8872	130.726	13	3.9
1969	6	4	17	37	13.73	33.024	130.365	17	3.8
1969	6	20	12	9	35.2	32.1242	131.782	0	4.3
1969	6	21	18	24	39.81	32.3123	130.57	0	4.2
1969	6	27	0	46	36	42.309	131.06	550	4.9
1969	6	28	3	31	44.33	33.0518	130.25	0	3.6
1969	7	2	11	45	27.4	32.5918	132.057	24	4.3
1969	7	9	3	48	5.39	31.0025	130.471	122	4.1
1969	7	24	15	30	55.04	32.0868	132.063	0	4.2
1969	7	27	4	36	44	32.766	130.21	8	4.6
1969	7	27	4	47	39.69	32.7448	130.194	8	3.9
1969	8	1	19	19	24.77	31.9502	132.323	16	4.5
1969	8	12	10	19	28.43	33.3645	131.734	80	3.9
1969	8	16	12	31	53.25	31.4735	131.798	5	4.2
1969	8	24	9	9	26	31.801	132.21	37	4.7
1969	9	3	4	13	30.4	32.5452	129.971	15	4.1
1969	9	4	7	9	26	32.966	131.44	109	5.2
1969	9	7	9	23	47	33.643	131.78	98	5.5
1969	9	7	11	40	42.4	33.0238	130.409	16	3.8
1969	9	9	12	33	20	33.304	131.89	62	4.3
1969	9	11	11	19	20.66	33.3378	130.408	12	3.9
1969	9	17	2	39	33	31.7028	132.063	0	4.2
1969	9	18	3	40	51	31.075	131.55	28	6.3
1969	9	18	3	51	10	31.054	131.56	26	5.9
1969	9	21	7	29	37.86	31.083	130.356	140	4.1
1969	9	24	0	9	18.92	32.701	130.004	13	4.3
1969	9	24	8	36	28.67	32.0288	132.205	0	4.1
1969	9	27	15	52	34.71	31.0183	131.53	0	4.2
1969	9	29	23	54	47.73	31.3807	129.627	3	4.3
1969	10	3	16	35	43.92	31.0972	131.5	32	4.6
1969	10	3	16	35	46	31.735	131.26	33	4.9
1969	10	8	19	3	34.57	31.181	131.642	0	4.3
1969	10	17	19	39	10.66	31.0995	130.276	165	4.1
1969	10	23	17	37	50.07	33.0853	130.5	16	3.7
1969	10	29	20	3	36.64	33.0155	130.491	8	3.8
1969	11	2	12	42	44.8	31.0445	130.723	170	4.2
1969	11	13	2	5	21.08	32.9192	130.318	15	3.8
1969	11	15	10	29	48.77	32.5843	131.221	95	3.9
1969	11	16	19	56	3.52	33.0763	130.478	6	3.6
1969	11	27	9	30	58.29	33.9843	128.013	5	4.9
1969	11	30	1	43	17	33.271	132.36	45	5.3
1969	11	30	13	12	22	33.186	132.39	47	5.1
1969	12	4	20	24	11.18	33.0983	130.479	23	3.9
1969	12	8	2	59	5.03	32.112	130.97	120	3.9
1969	12	12	0	0	23.92	32.733	129.969	8	4.1
1969	12	14	15	1	2.43	31.3325	131.792	28	4.3
1969	12	16	1	35	26.14	32.7212	129.886	16	4.1
1969	12	16	3	8	3.63	32.7355	129.906	12	4.2
1969	12	17	7	59	0.97	32.7432	130.183	8	3.9
1969	12	23	16	6	57.32	33.5402	132.317	43	4.1
1969	12	27	7	28	16.74	32.7212	130.795	8	3.9
1969	12	31	1	23	54.35	33.0165	130.506	14	4
1970	1	1	15	18	14.82	32.231	131.843	30	4.1
1970	1	3	3	57	29.86	32.741	130.772	6	3.9
1970	1	18	12	21	23.22	32.9603	130.274	1	4.3
1970	1	22	18	6	11.03	32.7572	130.177	9	3.9
1970	1	22	23	34	6.82	32.7743	130.2	9	3.8
1970	1	23	10	12	59.78	32.7312	130.148	10	4.1
1970	2	3	16	22	33.34	32.0782	132.266	6	4.5
1970	2	12	18	43	17.44	36.5305	127.638	54	4.8
1970	2	14	22	56	4.2	31.1533	131.313	50	4.4
1970	3	4	9	1	49.57	33.0115	130.343	2	4.1
1970	3	4	20	7	6.74	33.0657	130.254	1	3.8
1970	3	6	8	44	27.4	33.8067	132.227	50	4.1
1970	3	18	2	7	15	31.405	130.76	124	5.3
1970	4	3	13	27	16	33.214	132.33	33	4.3
1970	4	7	4	29	58.95	32.8818	130.755	13	3.7
1970	4	22	9	26	2.66	33.0583	130.435	1	3.7
1970	4	28	1	5	17.81	32.0412	132.04	5	4.3
1970	4	28	1	50	26.25	32.0163	132.002	10	4.3
1970	4	28	1	52	25.51	32.0838	132.089	0	4.2
1970	5	13	17	19	36.92	32.0722	132.221	23	4.3
1970	5	31	8	10	9.69	31.6907	131.969	16	4.1
1970	6	3	20	11	45.05	32.726	130.206	9	4
1970	6	11	13	40	7.56	31.1768	130.396	163	4.1
1970	6	14	12	3	12	31.919	130.39	11	5.5
1970	6	20	4	0	42.62	33.6158	132.311	55	3.8
1970	6	22	11	30	20.86	31.0002	131.094	66	4.3
1970	6	22	11	30	22	31.669	130.84	35	4.9
1970	6	24	7	23	37.85	31.113	130.494	153	3.9
1970	6	27	18	36	45.82	31.188	130.866	86	4.2
1970	7	4	14	36	57.03	31.3897	131.496	3	4.1
1970	7	10	9	13	29	32.74	130.18	13	4.5
1970	7	12	14	35	28.57	31.6705	131.915	0	3.9
1970	7	14	12	20	11.76	32.7073	130.187	13	4
1970	7	14	12	51	43.96	32.7117	130.171	12	4.2
1970	7	26	7	41	13	32.155	131.81	35	6.3
1970	7	26	7	43	47.69	31.9512	132.024	9	5
1970	7	26	7	59	46	32.126	131.99	10	4.7
1970	7	26	8	9	21	32.037	132.02	14	4.2
1970	7	26	8	24	1	31.958	131.9	25	4.4
1970	7	26	8	28	25	32.122	131.72	33	5.1
1970	7	26	8	34	23	32.23	132.01	0	4.4
1970	7	26	9	22	55	32.101	132.05	12	4
1970	7	26	9	25	18	32.31	131.8	0	4.2
1970	7	26	9	30	51	31.572	132.05	31	4.3
1970	7	26	10	57	38.26	32.1168	131.984	0	4.1
1970	7	26	11	30	17.86	32.0568	131.827	0	3.9
1970	7	26	11	37	58	31.93	132.1	28	4.9
1970	7	26	13	35	4	31.959	132.09	25	4.5
1970	7	26	16	10	38	32.187	131.87	31	6.2
1970	7	26	16	34	10.56	32.1793	131.816	68	3.9
1970	7	26	20	25	50.95	32.1327	131.907	0	3.9
1970	7	27	16	2	51.55	33.6587	132.369	52	4.1
1970	7	27	16	5	33	32.03	132.1	10	4.2
1970	7	28	0	28	21.77	31.9562	132.14	25	3.9
1970	7	28	3	12	18	32.1	132.25	10	4.1
1970	7	28	9	7	36	32.16	132.15	0	4.1
1970	7	28	16	54	15.87	32.1317	131.8	18	3.8
1970	8	1	13	35	17	31.869	132.12	26	4.3
1970	8	3	15	0	27.18	31.3313	131.927	39	4.3
1970	8	3	15	52	33	31.193	131.82	29	4.7
1970	8	9	6	55	46	32.72	130.82	10	4.5
1970	8	9	15	12	40	32.75	130.87	10	4.3
1970	8	9	15	25	2	32.73	130.83	10	4.3
1970	8	9	15	37	49	32.8	130.88	10	4
1970	8	9	19	1	6	32.78	130.87	10	4.1
1970	8	10	0	28	35	32.8	130.18	0	4.3
1970	8	16	15	42	13.86	31.2262	131.783	55	4.5
1970	8	18	11	0	10.4	31.9823	131.3	103	3.9
1970	8	18	14	45	49	31.872	131.96	26	4.5
1970	9	2	19	5	39	31.825	131.3	14	4
1970	9	14	20	15	54	40.757	131.74	560	4.9
1970	9	20	5	30	52	32.803	132.37	29	4.8
1970	9	21	14	8	19	31.169	131.71	32	4.7
1970	9	26	15	55	45.12	34.2413	132.338	10	3.6
1970	10	12	18	33	38	42.807	131.09	558	5.5
1970	10	26	5	33	9.16	31.1123	130.417	157	4.3
1970	11	8	22	38	55	41.792	131.46	500	4.3
1970	11	21	1	53	0.98	33.0963	131.613	79	4.1
1970	11	22	19	54	45	32.07	132.05	0	4.2
1970	11	26	7	51	54	32.37	132.12	0	4.3
1970	12	10	4	33	0	31.154	130.47	170	5.1
1970	12	13	18	54	1	33.12	130.38	20	4.2
1970	12	19	17	23	10	32.63	132.33	20	4.1
1970	12	20	18	30	50	33.43	132.2	40	4
1970	12	31	12	18	59	33.75	132.32	60	4
1971	2	3	3	14	57	31.825	131.73	40	4.8
1971	2	9	11	13	45.77	31.513	131.326	56	3.9
1971	2	15	11	16	18	32.75	130.1	10	4.3
1971	2	15	11	35	8	32.72	130.1	10	4.3
1971	2	15	11	57	39	32.724	130.06	10	4.9
1971	2	15	12	12	27	32.68	130.13	10	4.3
1971	2	15	16	3	25	32.72	130.12	10	4.3
1971	2	20	11	44	20	32.68	130.1	20	4.3
1971	3	7	7	14	49	33.45	130.43	20	4.3
1971	3	18	19	35	54.03	32.5467	131.139	139	4.4
1971	3	24	13	40	16	32.78	130.77	10	4.3
1971	3	25	20	56	51	33.07	132.38	50	4.3
1971	3	26	4	46	37	32.6	130.23	20	4.1
1971	3	31	1	0	1	32.75	130.13	10	4.1
1971	4	12	19	35	38	32.82	130.13	0	4.1
1971	4	27	8	58	18	31.7	132.05	10	4.1
1971	4	29	15	25	54.81	33.5443	131.781	90	4
1971	5	13	8	28	58.58	31.0338	130.594	120	4.3
1971	5	15	4	28	7	32.12	129.87	10	4.1
1971	5	15	13	22	7	34.82	132.22	0	4.4
1971	5	16	6	6	38	33.24	132.31	41	5
1971	5	16	7	11	11	31.228	130.11	155	5.3
1971	5	23	8	34	58	34.22	131.72	10	4.1
1971	5	25	22	0	20	31.372	131.45	33	5.9
1971	5	26	15	13	14	31.363	131.59	33	5.8
1971	5	29	17	52	44	31.378	131.37	33	5.9
1971	6	2	19	14	33	32.972	130.35	12	4.5
1971	6	12	10	57	42	32.819	131.89	59	4.4
1971	6	16	13	12	4.93	31.4988	131.951	11	4
1971	6	22	0	18	7	32.72	132.28	0	3.9
1971	6	24	4	52	36.5	32.221	131.057	123	4.1
1971	6	24	12	35	40	33.42	131.97	60	4.1
1971	6	28	11	49	45.63	31.0663	131.038	10	3.8
1971	7	14	15	5	45.36	31.6323	131.146	86	3.9
1971	8	2	22	59	33.67	31.3903	130.533	159	4.2
1971	8	3	1	56	40	35.385	123.91	35	5.6
1971	8	10	9	43	55	31.292	132	29	4.9
1971	8	11	5	40	36	33.651	132.23	49	4.3
1971	8	15	15	47	59	31.335	128.87	10	4.9
1971	8	18	9	15	52.18	31.418	131.866	17	4.1
1971	9	10	0	11	16.71	32.1275	131.008	2	3.6
1971	9	11	5	35	59	33.053	129.85	2	4.4
1971	10	11	20	28	49	33.727	131.95	68	4.4
1971	10	14	1	23	17.18	31.2797	131.275	50	4.4
1971	10	18	12	2	17	31.823	132.18	3	4.4
1971	10	19	0	23	23.05	33.4485	132.098	69	4.4
1971	10	22	21	28	4.06	31.1478	129.799	0	4.1
1971	10	25	17	48	37.38	34.0447	132.223	65	3.9
1971	10	29	17	28	59	31.827	131.96	25	4.5
1971	11	7	3	15	25	32.45	129.73	10	4.4
1971	11	7	3	36	6	32.47	129.72	10	4.1
1971	11	11	19	17	38.27	31.3435	130.501	155	4.3
1971	11	16	11	5	17	31.897	132.15	31	4.5
1972	1	12	23	22	10	33.05	131.18	10	4.3
1972	1	18	4	7	59	33.1	132.1	10	4.4
1972	1	20	17	32	57	33.52	132.28	40	4
1972	2	1	6	4	0.74	31.6375	130.726	122	3.8
1972	2	8	23	5	45	31.67	131.75	40	4.1
1972	2	21	22	48	11.4	31.4013	131.945	21	4.1
1972	2	21	23	55	24	31.365	131.84	26	5
1972	2	24	7	25	26	32.68	132.43	10	4.1
1972	3	22	17	10	39	32.45	129.95	0	4.3
1972	3	23	0	6	53	32.78	132	30	4
1972	4	14	4	43	55.98	33.2563	131.297	0	4
1972	4	24	1	41	28.46	32.5582	132.435	16	4
1972	5	12	3	33	32	33	130.58	20	4.1
1972	5	16	20	26	36	34.65	131.97	10	4.2
1972	5	18	13	20	19	34.18	132.17	10	3.9
1972	5	23	12	36	21	31.66	131.92	24	3.9
1972	5	27	22	55	15	36.684	123.74	35	5
1972	6	3	16	44	57.71	32.7822	130.213	8	3.7
1972	6	22	0	29	51	32.014	131.86	33	5.6
1972	6	22	0	59	2	31.915	131.92	7	4.5
1972	6	22	15	8	54	31.76	131.9	40	5.2
1972	7	5	22	28	30.42	31.0042	130.923	102	3.8
1972	8	16	16	54	17	31.67	131.99	10	4.2
1972	9	3	1	31	39	33.62	130.17	20	4.1
1972	9	6	20	42	25	32.787	130.43	11	5
1972	9	7	0	33	25	32.742	130.39	11	4.3
1972	9	7	2	20	13.2	32.6763	130.475	2	4
1972	9	11	23	29	49	32.75	130.43	10	4.1
1972	9	14	12	35	6	31.666	132.06	23	4.2
1972	10	1	2	27	30.87	31.2647	132.071	17	4.1
1972	10	16	15	29	8.65	31.2948	131.125	78	3.8
1972	10	21	22	4	45	32.67	129.9	10	4.2
1972	10	27	16	9	3	32.6	130.02	0	4.1
1972	11	2	19	57	18	32.7	129.9	10	4.5
1972	11	9	5	41	34	33.446	132.44	33	4.4
1972	11	18	3	55	36	32.78	131.25	10	4.1
1972	11	29	16	52	23	34.65	132.3	20	4.1
1972	12	2	23	31	4.58	33.565	131.874	86	4.1
1972	12	4	7	8	36	31.919	131.76	28	5.4
1972	12	10	22	41	37	32.42	131.68	20	4.1
1973	2	25	19	9	45	34.732	132.38	5	4.6
1973	2	26	22	38	13	33.693	132.31	43	4.4
1973	3	3	8	20	3.21	35.0437	131.993	17	4.1
1973	5	24	19	42	5	33.146	131.44	121	4.1
1973	6	9	22	44	48.97	31.147	130.459	159	4.2
1973	6	18	18	58	25.41	31.0627	131.567	0	4.1
1973	6	21	15	42	51.76	32.0812	130.078	2	4
1973	7	3	19	57	9	31.007	130.47	148	5.2
1973	7	7	16	48	18.02	32.6972	130.747	9	3.9
1973	7	9	14	14	12.7	31.5407	129.069	13	4.4
1973	7	26	23	45	51	32.062	131.07	110	4.4
1973	7	30	23	16	15	31.798	131.89	36	5.1
1973	8	10	18	26	50.78	32.7928	130.236	4	3.9
1973	8	11	5	59	49.94	31.3285	130.54	152	4.1
1973	8	14	2	48	54	32.57	131.93	29	4.2
1973	8	25	7	18	0	33	130.25	0	4.2
1973	8	30	19	41	28	32.451	130.26	13	4.5
1973	9	2	5	37	26	33.424	130.55	13	5.1
1973	9	9	4	29	47	33.557	132.28	45	4.7
1973	9	10	16	43	35	42.496	130.99	566	6
1973	9	22	0	24	29.62	31.9648	132.181	12	4.1
1973	9	29	9	44	2	41.955	131.01	578	6.6
1973	10	13	13	23	16	31.77	131.9	0	4.1
1973	11	15	15	18	52	33.28	132.2	30	4.1
1973	11	16	3	2	51	33.557	131.84	87	4.1
1973	11	19	0	53	3	31.88	129.15	23	5
1973	11	25	20	11	22	31.9	129.27	10	4.3
1973	12	3	8	26	31.1	33.723	130.606	19	3.7
1973	12	6	16	17	5.95	33.6017	132.435	44	4.1
1973	12	11	14	51	57	33.73	132.23	40	4.3
1973	12	27	13	19	18	33.3	132.38	30	4
1973	12	31	1	25	41	32.12	132	40	4.3
1974	1	1	6	28	8	33.12	130.48	0	4.2
1974	1	4	3	30	35	32.915	132.25	35	4.1
1974	1	7	0	57	21	32.73	130.2	10	4.1
1974	1	10	19	31	51	42.416	131.14	550	4.9
1974	1	10	19	51	57	31.82	131.88	10	4.2
1974	1	11	1	13	27	31.868	131.76	33	5.4
1974	1	11	1	44	53	31.718	131.88	14	4.4
1974	1	13	10	41	9	31.95	131.8	0	4.3
1974	1	20	15	38	53	33.356	132.34	47	4.4
1974	1	31	16	3	59	31.815	131.91	32	6
1974	1	31	21	4	53	31.7	132.05	20	4.4
1974	2	1	5	59	23	31.62	131.93	27	4.7
1974	2	1	9	16	24.33	31.5723	131.871	15	4.1
1974	2	4	8	35	3	32.93	130.9	20	4.4
1974	2	4	8	41	50.66	32.9488	130.92	6	3.9
1974	2	11	20	17	32.28	32.9187	130.925	0	4.5
1974	2	13	20	52	50	32.93	130.75	0	3.9
1974	3	26	14	9	15	32.756	130.42	11	4.3
1974	4	18	18	42	42	32.78	131.7	60	4.2
1974	4	22	19	27	1	33.386	131.98	59	4.1
1974	5	17	20	25	39	31.185	131.52	32	4.4
1974	5	31	21	7	49	31	131	0	4.2
1974	6	8	4	23	35.26	31.0607	131.521	55	4.4
1974	6	12	5	1	8	32	129.73	0	4.3
1974	6	27	13	49	18	32.306	132.07	39	5.3
1974	6	29	9	34	59.25	31.0918	131.431	53	4.1
1974	6	30	13	49	6	32.73	130	0	4.3
1974	7	7	5	13	1	33.572	132.32	54	5.3
1974	7	19	14	8	1.28	32.567	129.892	11	4.2
1974	8	3	5	15	31.04	31.3552	130.602	165	4.1
[truncated: 61,299 more rows]
